# Supplementary material for: Novel pyrene-calix[4]arene derivatives as highly sensitive sensors for nucleotides, DNA and RNA
Source: Royal Society of Chemistry journal article supplement (doi:10.1039/d3ra05696a), 2023-01-01
Supplement: d3ra05696a1.pdf [file d3ra05696a1.pdf]

## Electronic Supplementary Information

### Novel Pyrene-Calix[4]arene Derivatives as Highly Sensitive Sensors for Nucleotides, DNA and RNA

Ivana Nikšić-Franjić,<sup>a</sup> Benoit Collason,<sup>b</sup> Olivia Reinaud,<sup>b</sup> Aleksandar Višnjevac,<sup>a,\*</sup> Ivo Piantanida<sup>c</sup> and Dijana Pavlović Saftić<sup>c,\*</sup>

<sup>a</sup> *Division of Physical Chemistry, Laboratory for chemical and biological crystallography, Ruđer Bošković Institute, Bijenička cesta 54, 10000 Zagreb, Croatia*

<sup>b</sup> *Université de Paris - Laboratoire de Chimie et Biochimie Pharmacologiques et Toxicologiques, CNRS UMR 8601, 45 rue des Saints Pères, 75006 Paris, France*

<sup>c</sup> *Division of Organic Chemistry and Biochemistry, Laboratory for Biomolecular Interactions and Spectroscopy, Ruđer Bošković Institute, Bijenička cesta 54, 10000 Zagreb, Croatia*

\*Corresponding authors:

Dijana Pavlović-Saftić, e-mail: [dijana.pavlovic.saftic@irb.hr](mailto:dijana.pavlovic.saftic@irb.hr)

Aleksandar Višnjevac, e-mail: [aleksandar.visnjevac@irb.hr](mailto:aleksandar.visnjevac@irb.hr)

#### Contents

|                                                                                |           |
|--------------------------------------------------------------------------------|-----------|
| <b>1. NMR and HRMS spectra of 2 and 3</b> .....                                | <b>1</b>  |
| <b>3. Interactions with DNA and RNA</b> .....                                  | <b>11</b> |
| <b>3.1. Spectrophotometric titrations with mono- and polynucleotides</b> ..... | <b>12</b> |
| <b>3.2. Circular dichroism (CD) experiments</b> .....                          | <b>30</b> |
| <b>3.3. Thermal denaturation experiments</b> .....                             | <b>34</b> |

## 1. NMR and HRMS spectra of 2 and 3

### General procedures

Solvents were distilled from appropriate drying agents shortly before use. TLC was carried out on DC-plastikfolien Kieselgel 60 F<sub>254</sub> and preparative thick layer (2 mm) chromatography was done on Merck 60 F<sub>254</sub>. <sup>1</sup>H and <sup>13</sup>C NMR spectra were recorded in CD<sub>3</sub>CN on Bruker AV 600 MHz spectrometers. Chemical shifts (δ) are expressed in ppm, and *J* values in Hz. Signal multiplicities are denoted as s (singlet), d (doublet), t (triplet), q (quartet) and m (multiplet). High resolution mass spectra (HRMS) were obtained using a MALDI-TOF/TOF mass spectrometer 4800 Plus MALDI TOF/TOF analyzer (Applied Biosystems Inc., Foster City, CA, USA).

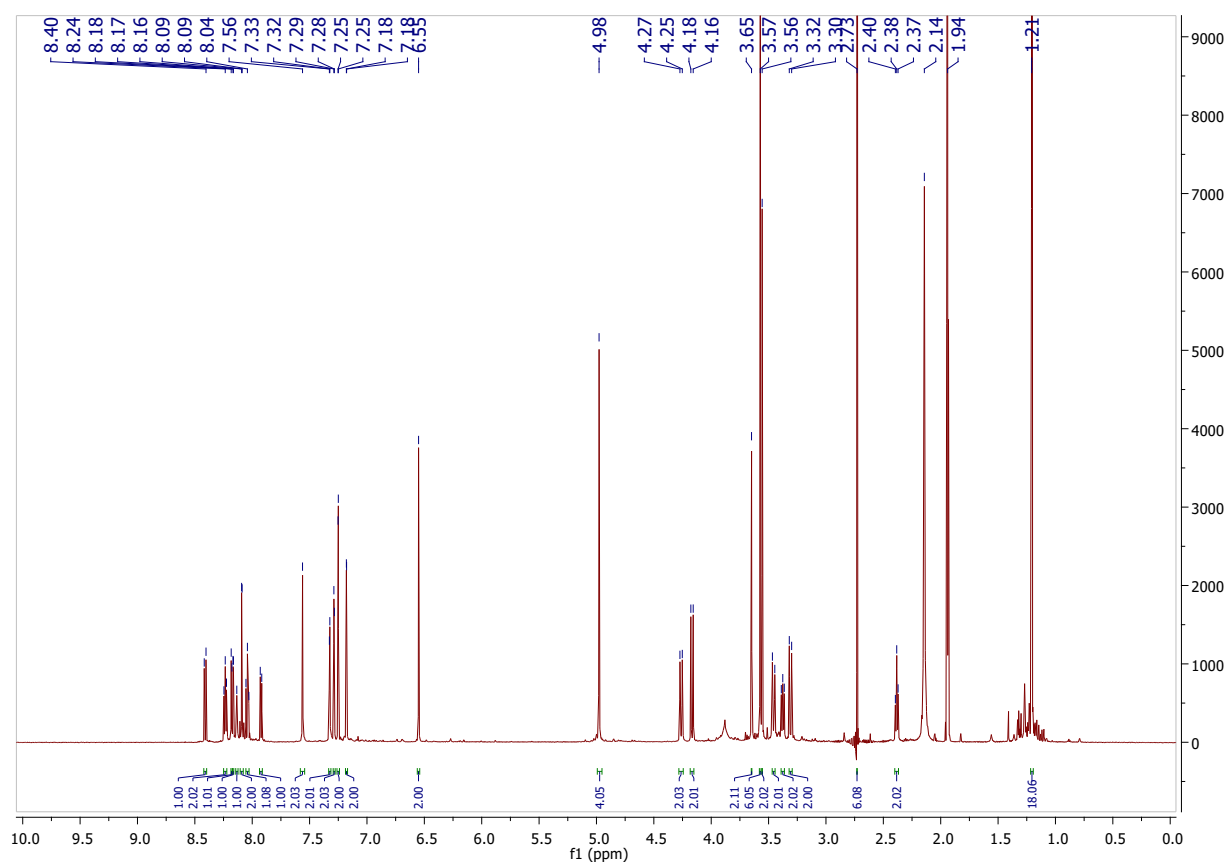

**Figure S1.** <sup>1</sup>H NMR (600 MHz) spectrum of compound 2 recorded in CD<sub>3</sub>CN.

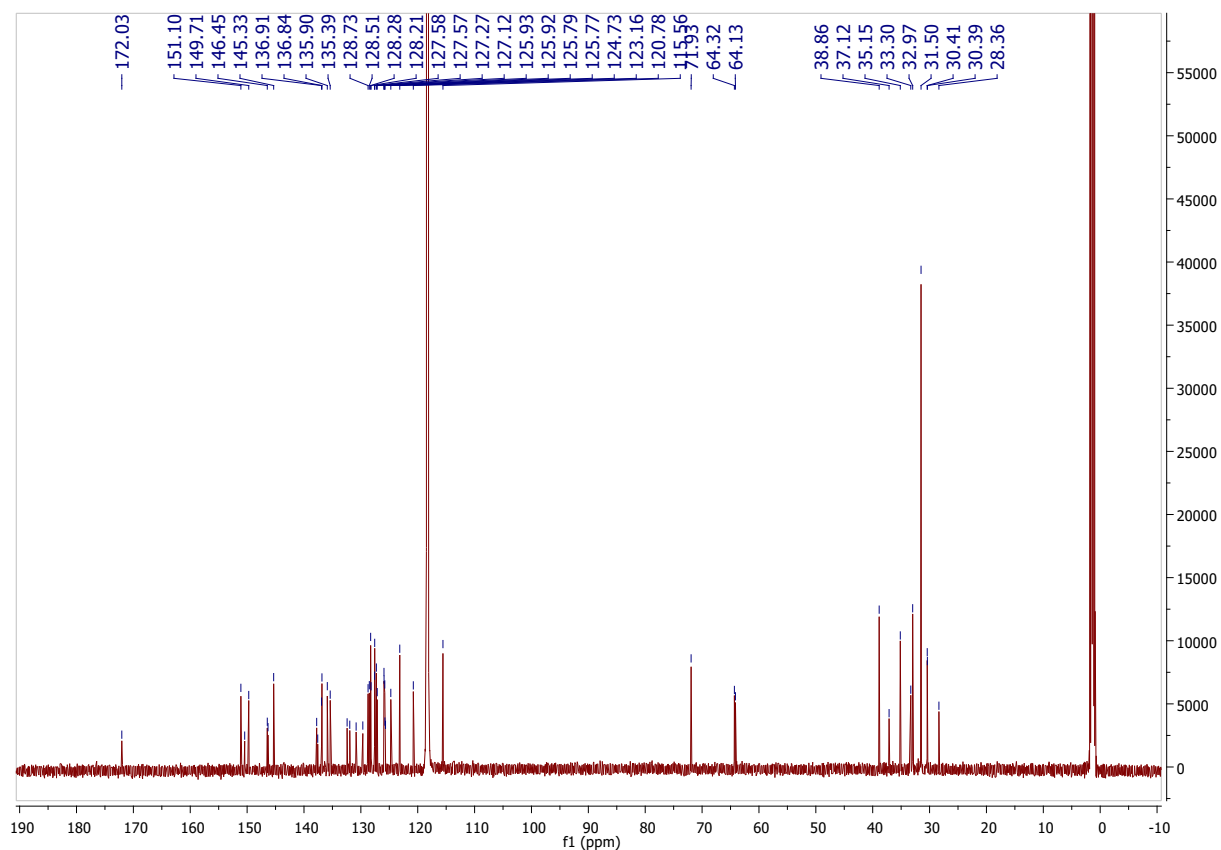

**Figure S2.**  $^{13}\text{C}$  NMR (151 MHz) spectrum of compound **2** recorded in  $\text{CD}_3\text{CN}$ .

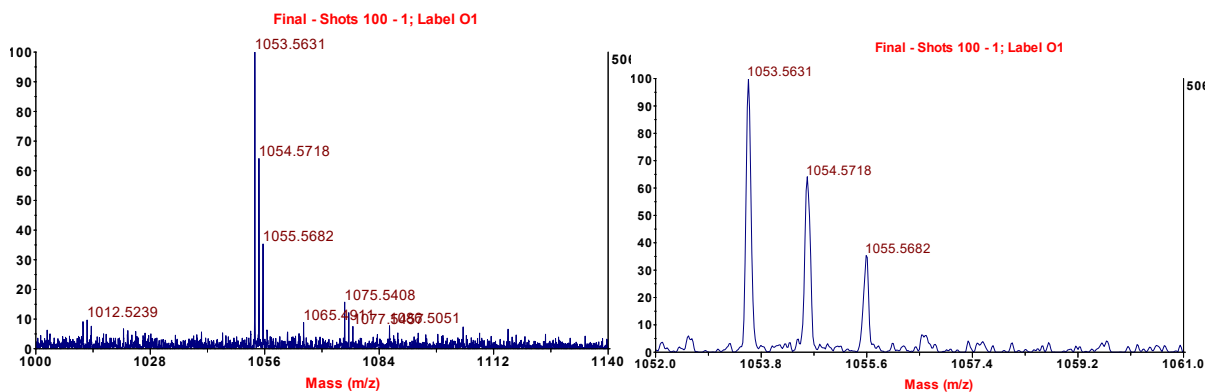

**Figure S3.** MALDI TOF/TOF mass spectrum of compound **2** in the range  $m/z$  1000 – 1140 (left), and magnification of the spectrum from  $m/z$  1052 to  $m/z$  1061 (right).

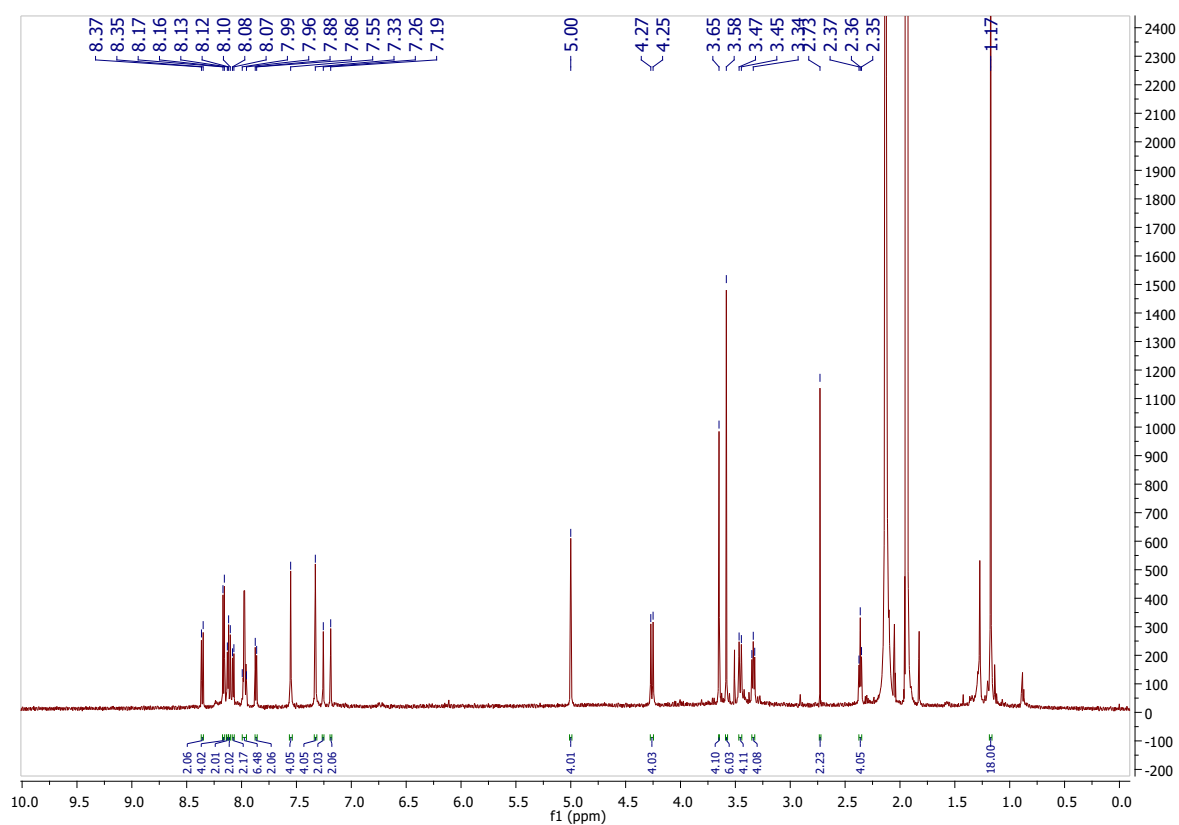

**Figure S4.**  $^1\text{H}$  NMR (600 MHz) spectrum of compound **3** recorded in  $\text{CD}_3\text{CN}$ .

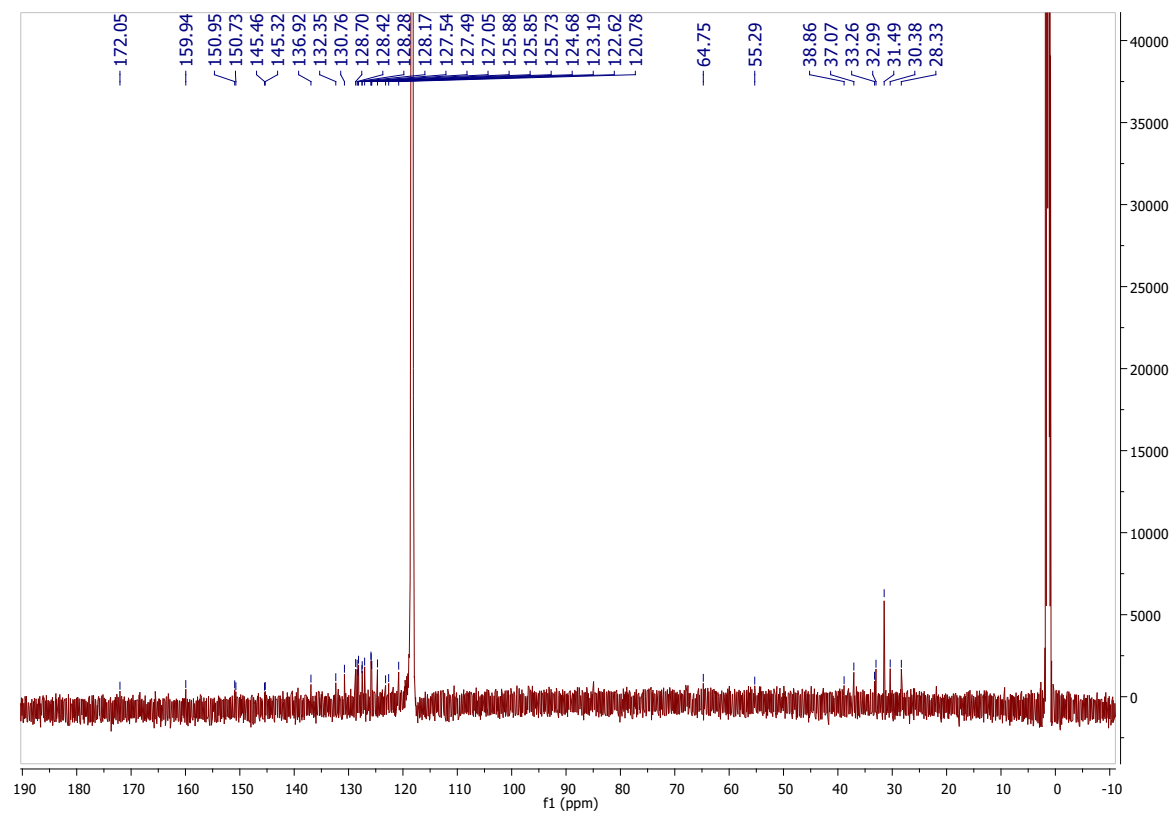

**Figure S5.**  $^{13}\text{C}$  NMR (151 MHz) spectrum of compound **3** recorded in  $\text{CD}_3\text{CN}$ .

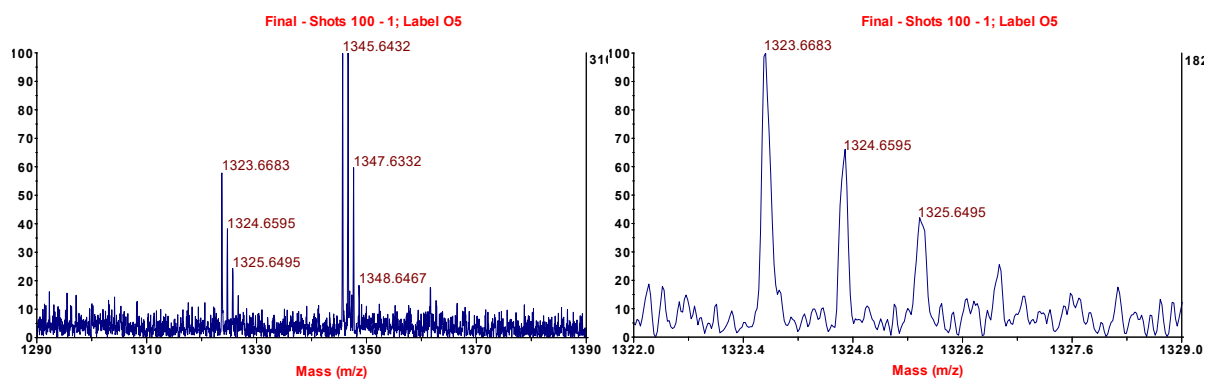

**Figure S6.** MALDI TOF/TOF mass spectrum of compound **3** in the range  $m/z$  1290 – 1390 (left), and magnification of the spectrum from  $m/z$  1322 to  $m/z$  1329 (right).

## 2. Spectrofluorimetric and photophysical characterization

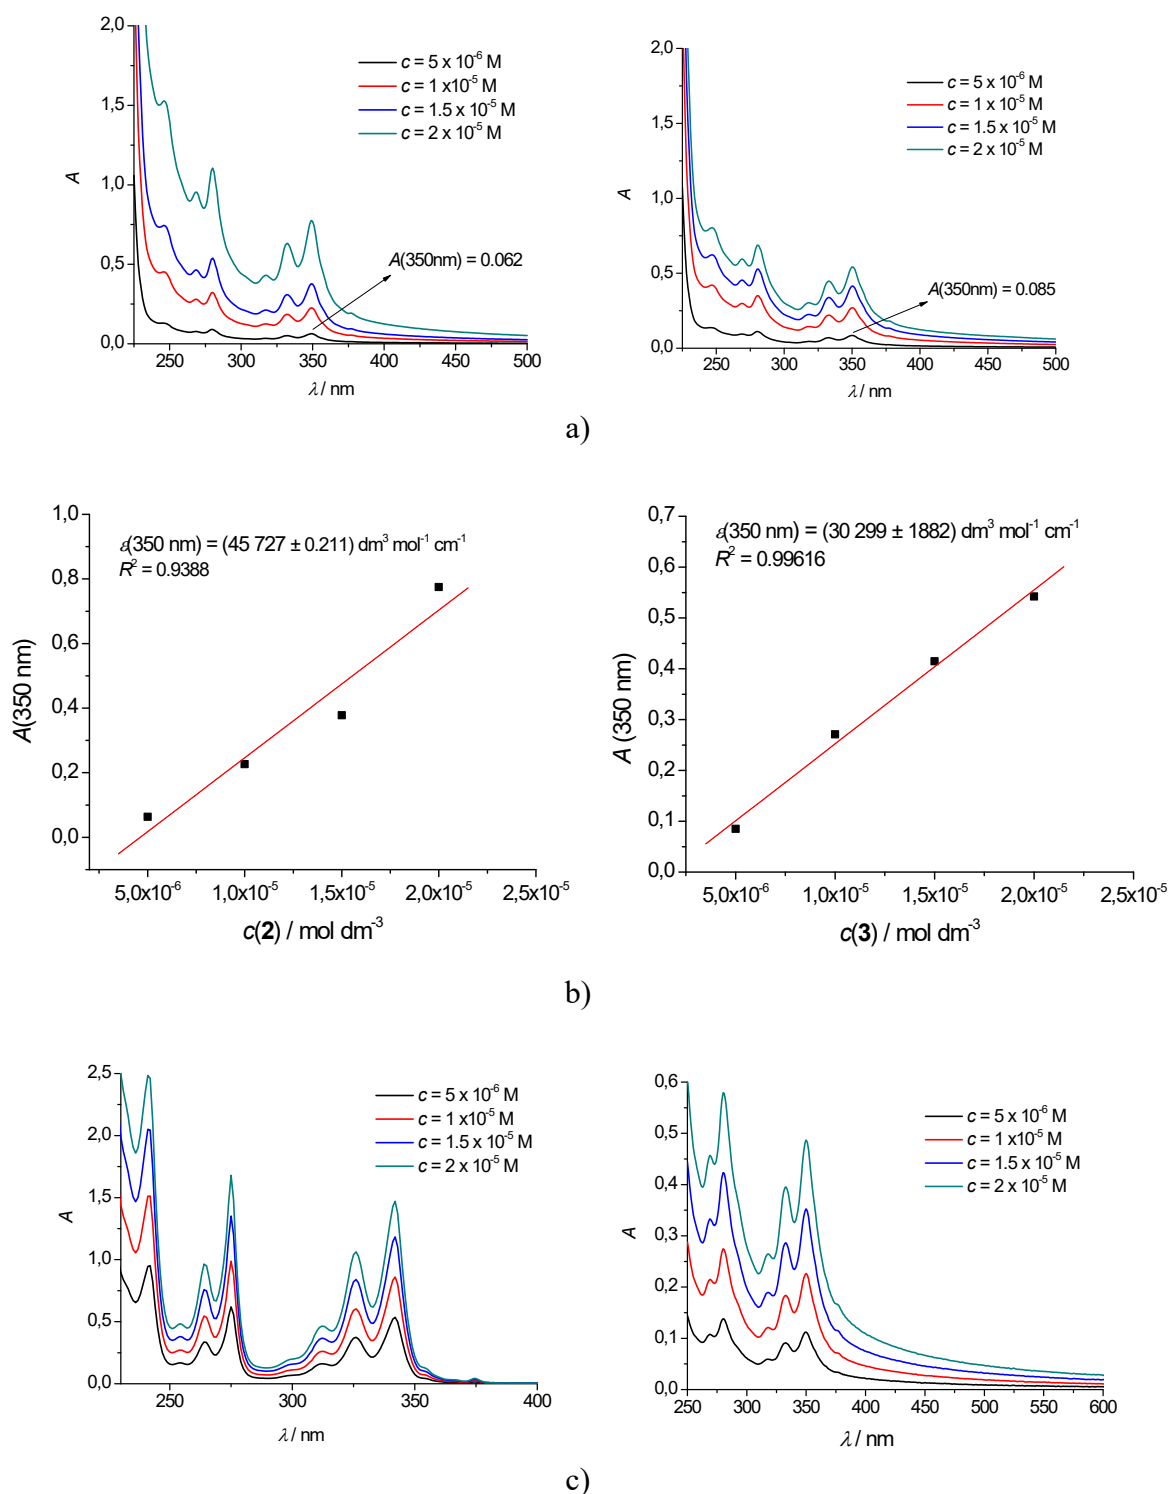

**Figure S7.** (a) UV/Vis spectra of studied conjugates **2** and **3** in water (0.1% DMSO); (b) absorbance dependence on  $c(2)$  or  $c(3)$  ( $c = 5 \times 10^{-6} - 2 \times 10^{-5} \text{ M}$ ); (c) UV/Vis spectra of referent compounds 1-pyrenebutyric acid (**A**) and **B** in buffered solution pH 7,  $I = 0.05 \text{ M}$ .

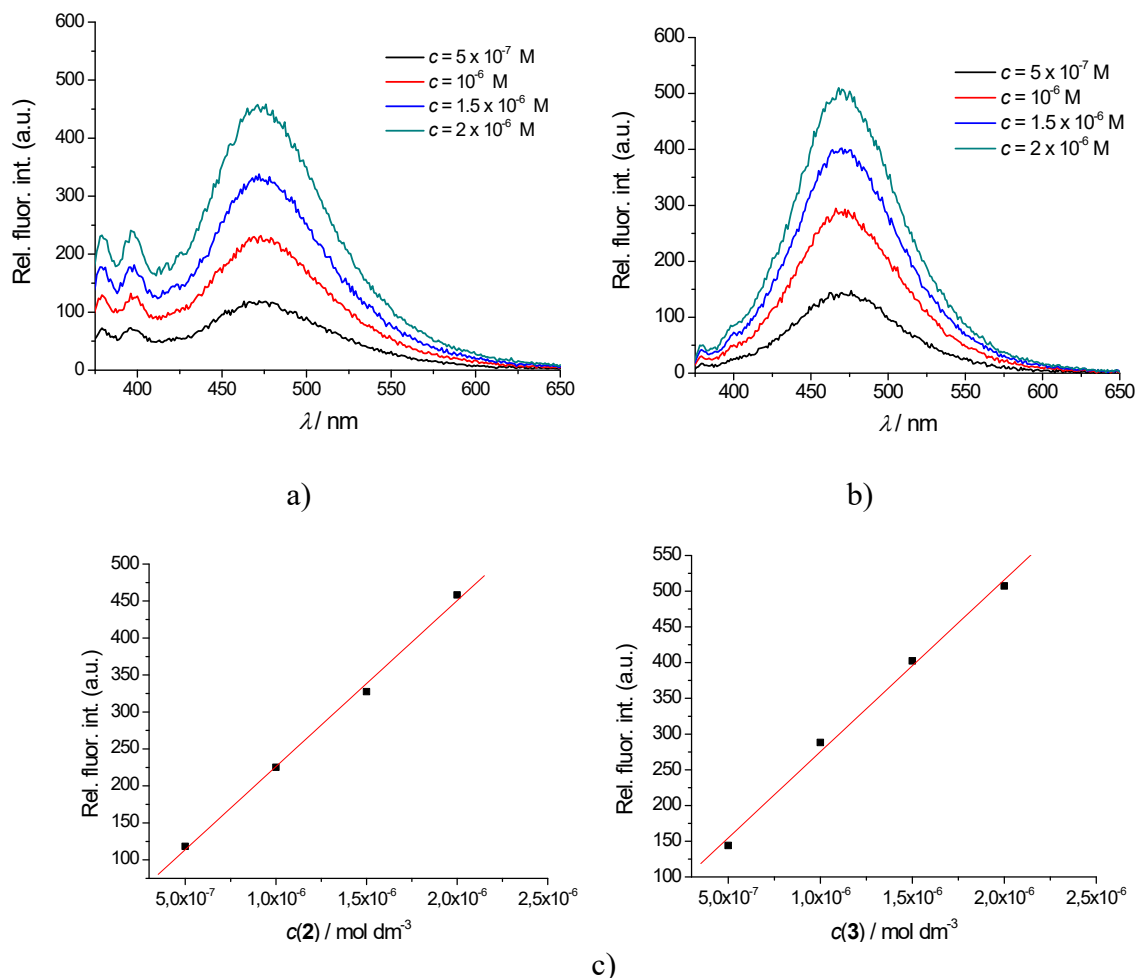

**Figure S8.** Fluorescence spectra of: a) **2** and b) **3**; c) relative fluorescence dependence on  $c(2)$  or  $c(3)$  ( $c = 5 \times 10^{-7} - 2 \times 10^{-6}$  M) at  $\lambda_{\text{em}} = 475$  nm. Done in water,  $\lambda_{\text{exc}} = 350$  nm.

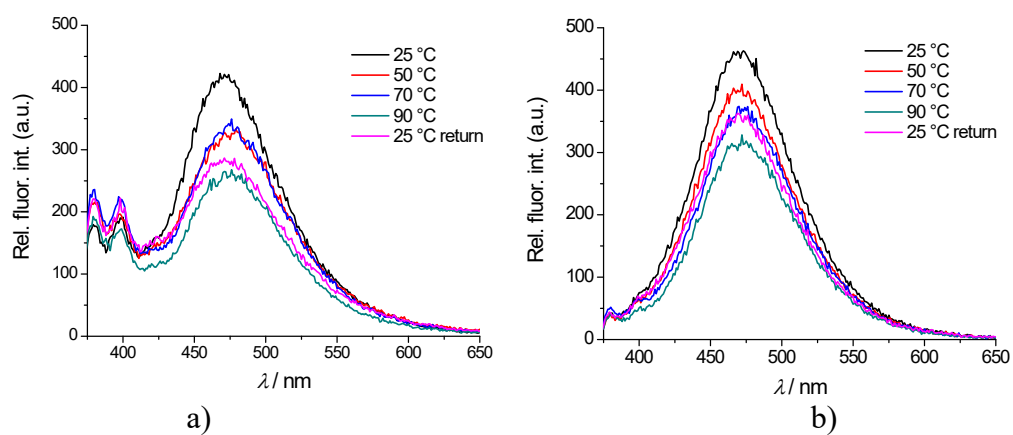

**Figure S9.** Temperature dependence of: a) **2** and b) **3** at concentration  $c = 2 \times 10^{-6}$  M. Done in water,  $\lambda_{\text{exc}} = 350$  nm.

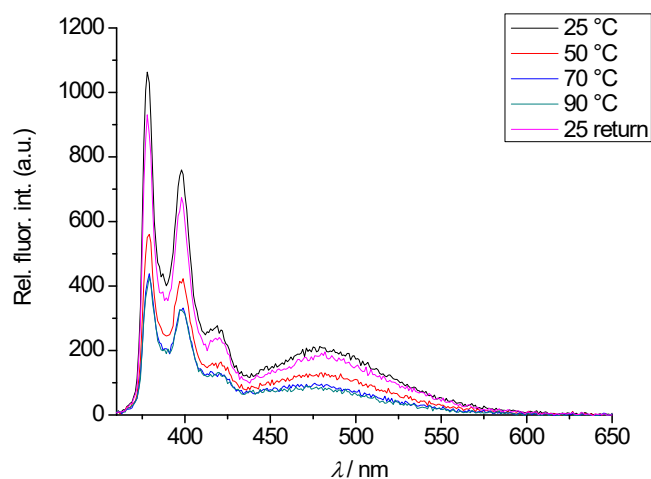

**Figure S10.** Temperature dependence of **3** at concentration  $c = 2 \times 10^{-6}$  M. Done in DMSO,  $l = 1$  cm,  $\lambda_{\text{exc}} = 350$  nm.

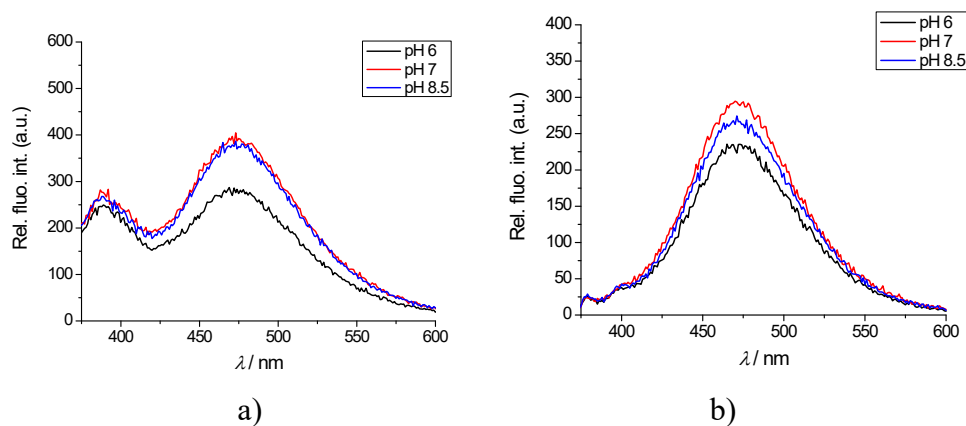

**Figure S11.** The dependence of the fluorescence spectra of compounds **2** (a) and **3** (b) ( $c = 1 \times 10^{-6}$  M) on pH. Done in phosphate buffer adjusted to various pH values by buffer preparation protocol.



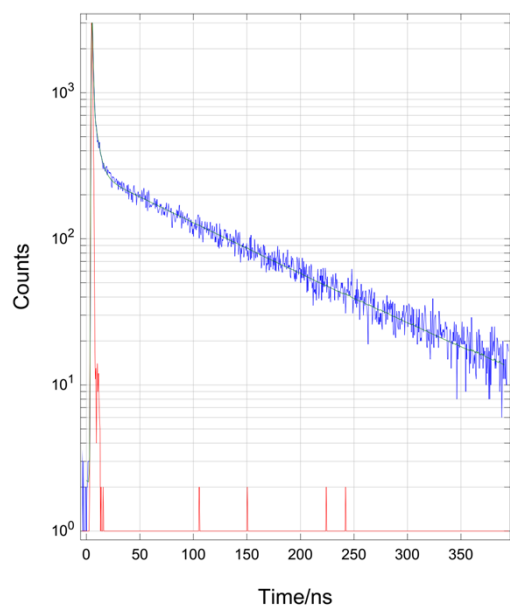

a) 400 nm, water

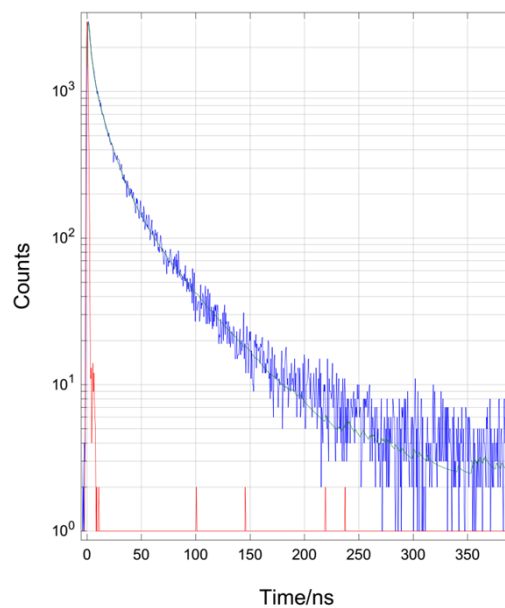

b) 475 nm, water

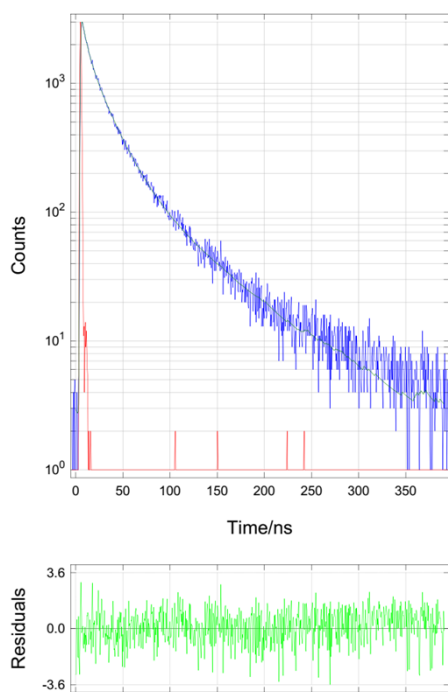

c) 400 nm, DMSO

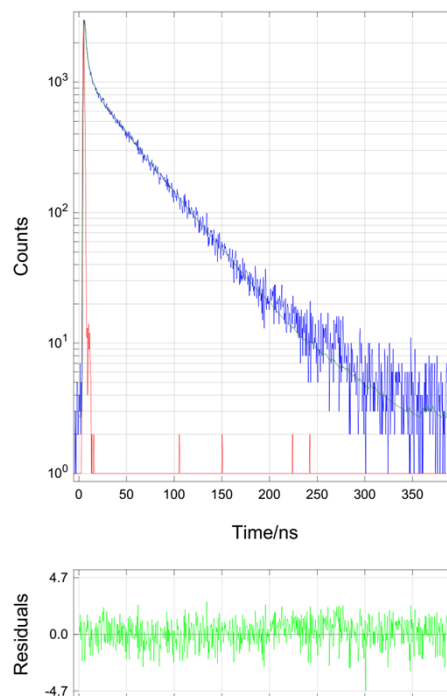

d) 475 nm, DMSO

**Figure S12.** Time resolved fluorescence decay for **2** ( $c = 10^{-6}$  M) in water and DMSO at emission wavelengths: 400 and 475 nm. Blue: **2** decay, red: IRF (instrument time response time scan), green: weighted residuals time scan.

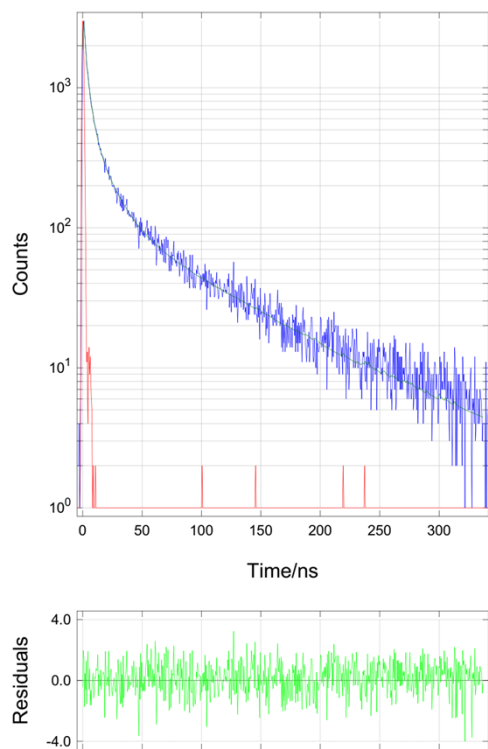

a) 400 nm, water

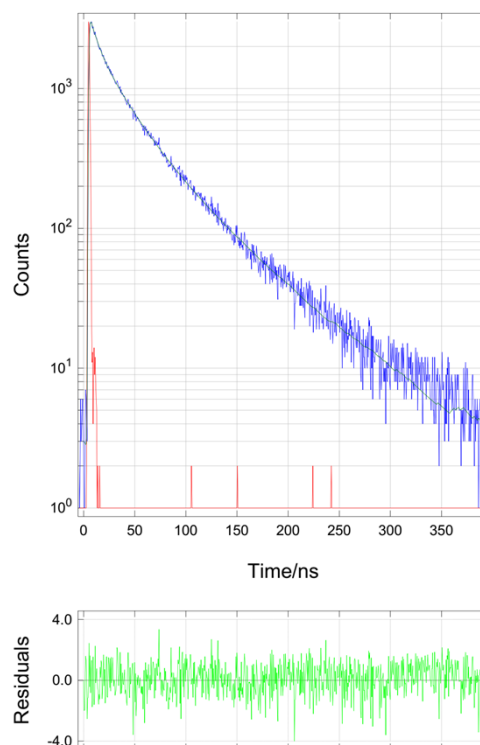

b) 475 nm, water

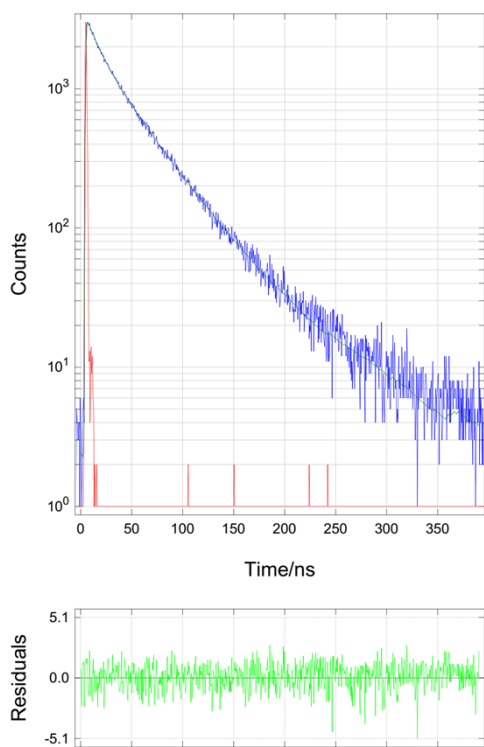

c) 400 nm, DMSO

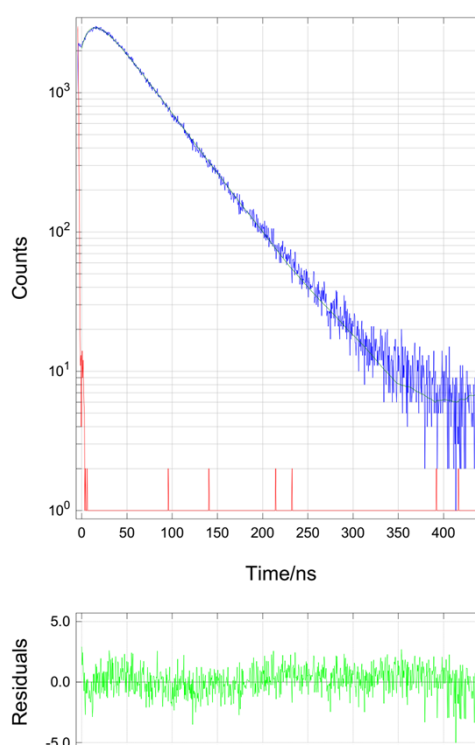

d) 475 nm, DMSO

**Figure S13.** Time resolved fluorescence decay for **3** ( $c = 10^{-6}$  M) in water and DMSO at emission wavelengths: 400 and 475 nm. Blue: **3** decay, red: IRF (instrument time response time scan), green: weighted residuals time scan.

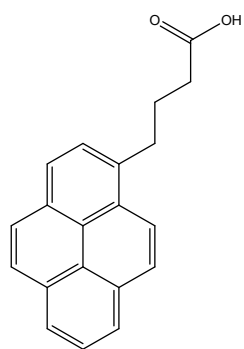

**A** = 1-pyrenebutyric acid

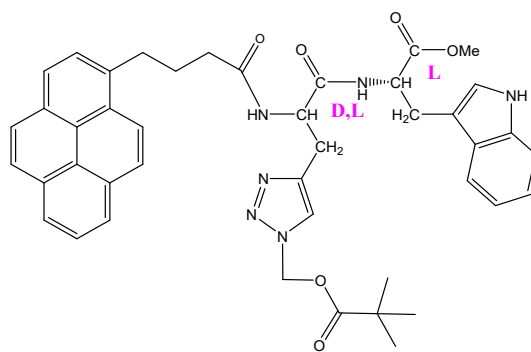

**B** = PyrL-Ala(Triazole-R)-Trp

**Figure S14.** Referent compounds **A** and **B** previously published.<sup>1</sup>

<sup>1</sup> I. Krošl, M. Koščak, K. Ribičić, B. Žinić, D. Majhen, K. Božinović and I. Piantanida, Impact of the Histidine-Triazole and Tryptophan-Pyrene Exchange in the WHW Peptide: Cu(II) Binding, DNA/RNA Interactions and Bioactivity, *Int. J. Mol. Sci.* 2022, **23**, 7006.

### 3. Interactions with DNA and RNA

**Table S1.** Structural features of selected nucleic acids.<sup>2,3</sup>

| Structure type                       | Groove width [Å] |       | Groove depth [Å] |       |
|--------------------------------------|------------------|-------|------------------|-------|
|                                      | major            | minor | major            | minor |
| <b>poly A- poly U (A-helix)</b>      | 3.8              | 10.9  | 13.5             | 2.8   |
| <b>ct-DNA (B-helix)</b>              | 11.7             | 5.7   | 8.5              | 7.5   |
| <b>(dGdC)<sub>n</sub> (B-helix)</b>  | 13.5             | 9.5   | 10.0             | 7.2   |
| <b>p(dAdT)<sub>2</sub> (B-helix)</b> | 11.2             | 6.3   | -                | -     |

<sup>2</sup> W. Saenger, *Principles of Nucleic Acid Structure*, Springer-Verlag, New York, 1983.

<sup>3</sup> C. R. Cantor, P. R. Schimmel, *Biophysical Chemistry*, 1980, **3**, 1109-1181.

### 3.1. Spectrophotometric titrations with mono- and polynucleotides

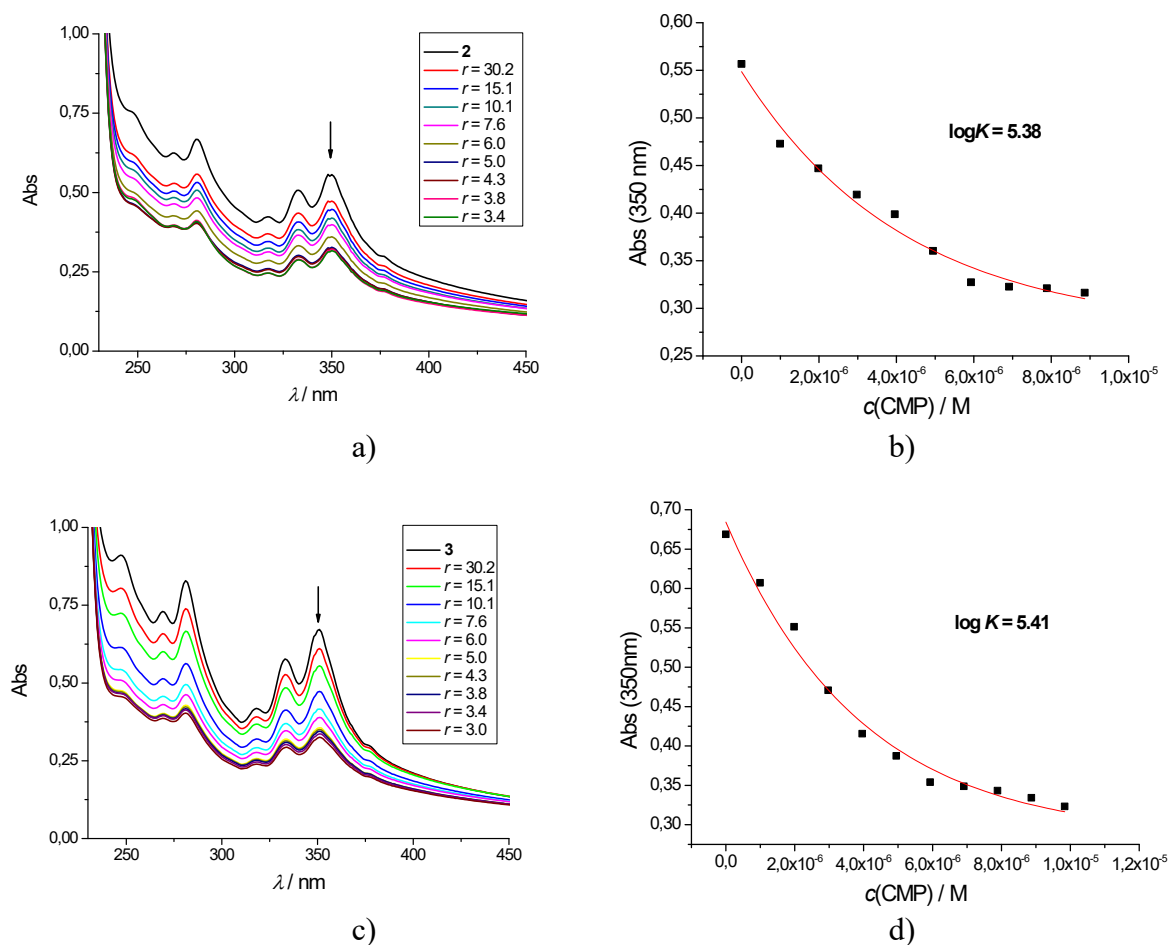

**Figure S15.** a) Spectrophotometric titration of **2** ( $c = 3 \times 10^{-5}$  M) with CMP ( $c = 1 \times 10^{-3}$  M) and b) dependence of absorption at  $\lambda_{\max} = 350$  nm on  $c(\text{CMP})$ ; c) spectrophotometric titration of **3** ( $c = 3 \times 10^{-5}$  M) with CMP ( $c = 1 \times 10^{-3}$  M) and d) dependence of absorption at  $\lambda_{\max} = 350$  nm on  $c(\text{CMP})$ . Done in sodium cacodylate buffer (pH=7.0,  $I = 0.05$  M);  $r = [\text{compound}] / [\text{mononucleotide}]$ .

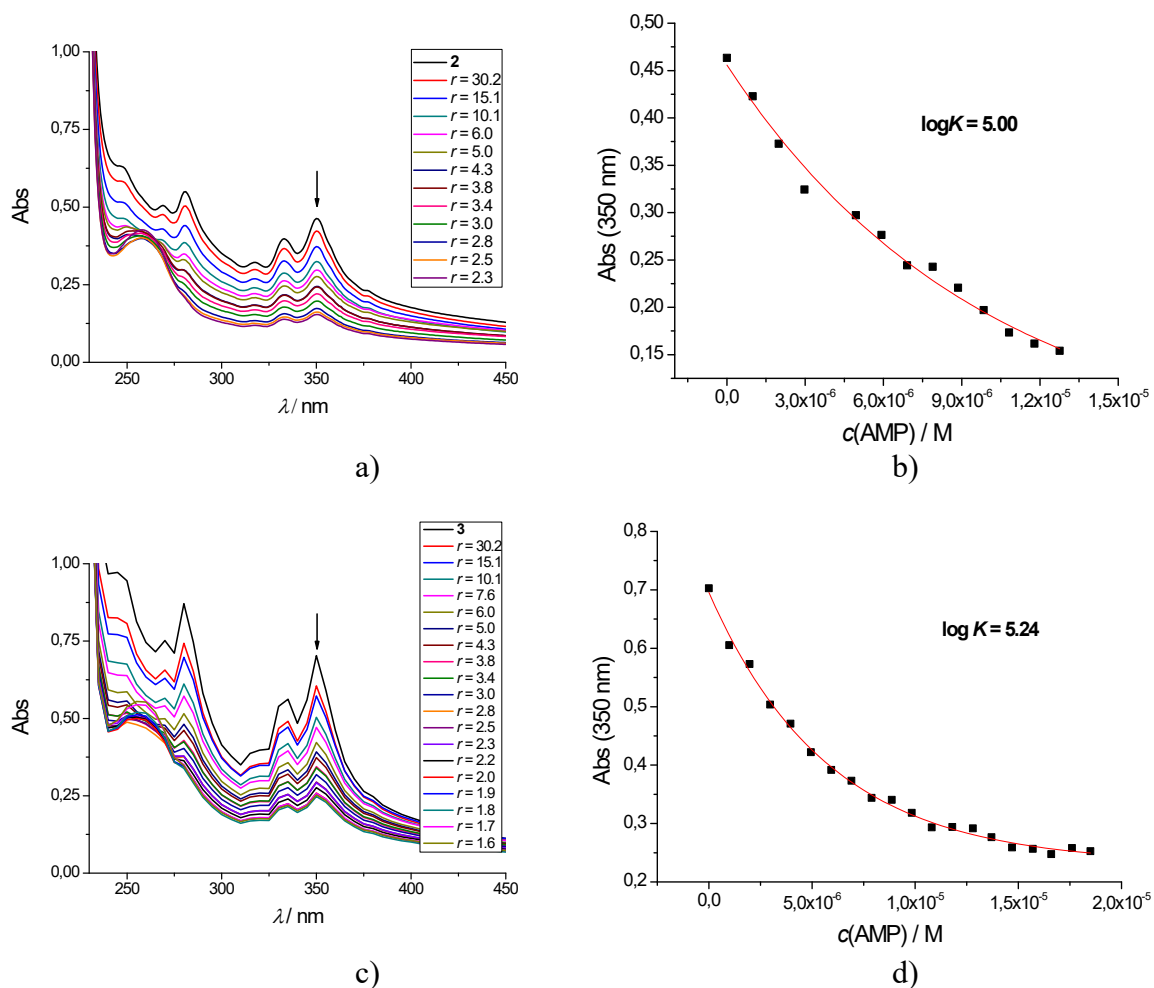

**Figure S16.** a) Spectrophotometric titration of **2** ( $c = 3 \times 10^{-5}$  M) with AMP ( $c = 1 \times 10^{-3}$  M) and b) dependence of absorption at  $\lambda_{\text{max}} = 350$  nm on  $c(\text{AMP})$ ; c) spectrophotometric titration of **3** ( $c = 3 \times 10^{-5}$  M) with AMP ( $c = 1 \times 10^{-3}$  M) and d) dependence of absorption at  $\lambda_{\text{max}} = 350$  nm on  $c(\text{AMP})$ . Done in sodium cacodylate buffer (pH=7.0,  $I = 0.05$  M);  $r = [\text{compound}] / [\text{mononucleotide}]$ .

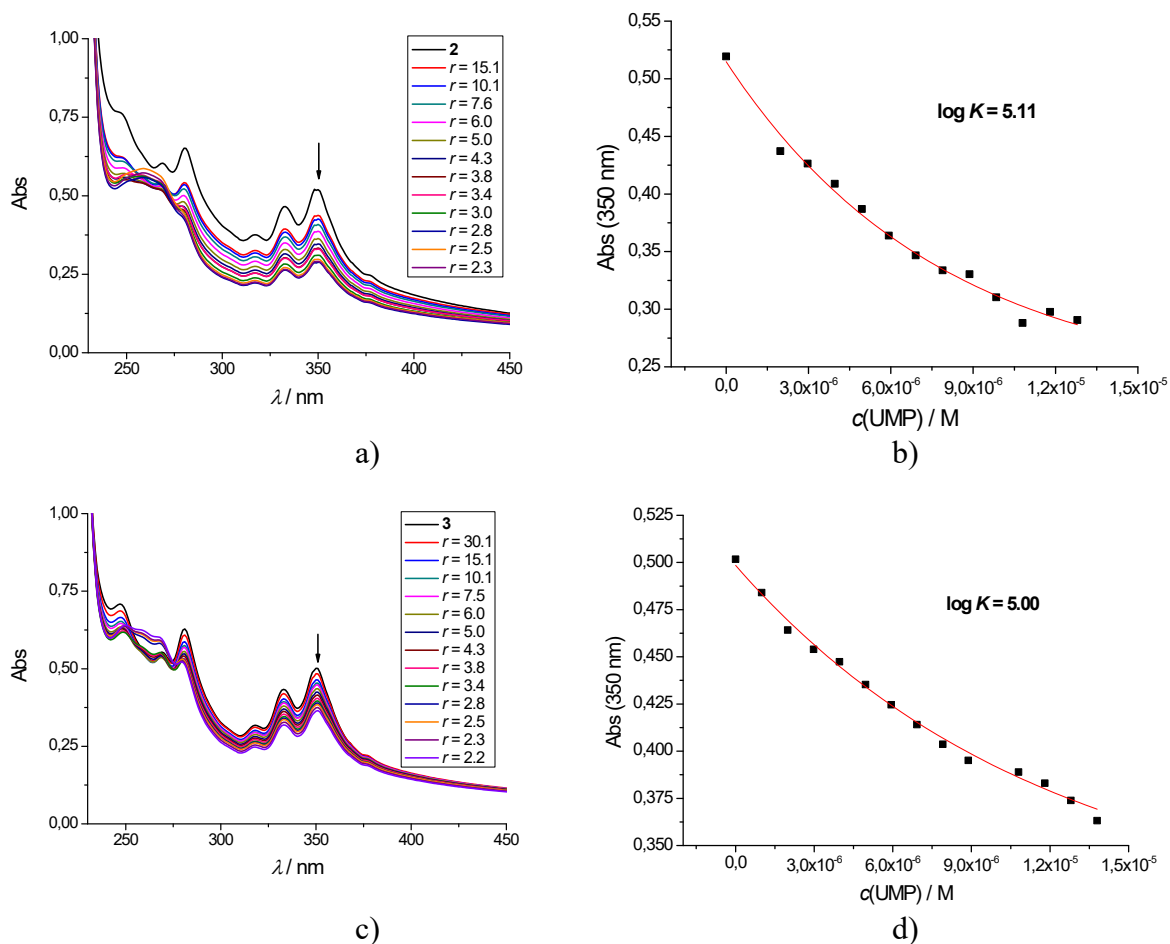

**Figure S17.** a) Spectrophotometric titration of **2** ( $c = 3 \times 10^{-5}$  M) with UMP ( $c = 1 \times 10^{-3}$  M) and b) dependence of absorption at  $\lambda_{\max} = 350$  nm on  $c(\text{UMP})$ ; c) spectrophotometric titration of **3** ( $c = 3 \times 10^{-5}$  M) with UMP ( $c = 1 \times 10^{-3}$  M) and d) dependence of absorption at  $\lambda_{\max} = 350$  nm on  $c(\text{UMP})$ . Done in sodium cacodylate buffer (pH=7.0,  $I = 0.05$  M);  $r = [\text{compound}] / [\text{mononucleotide}]$ .

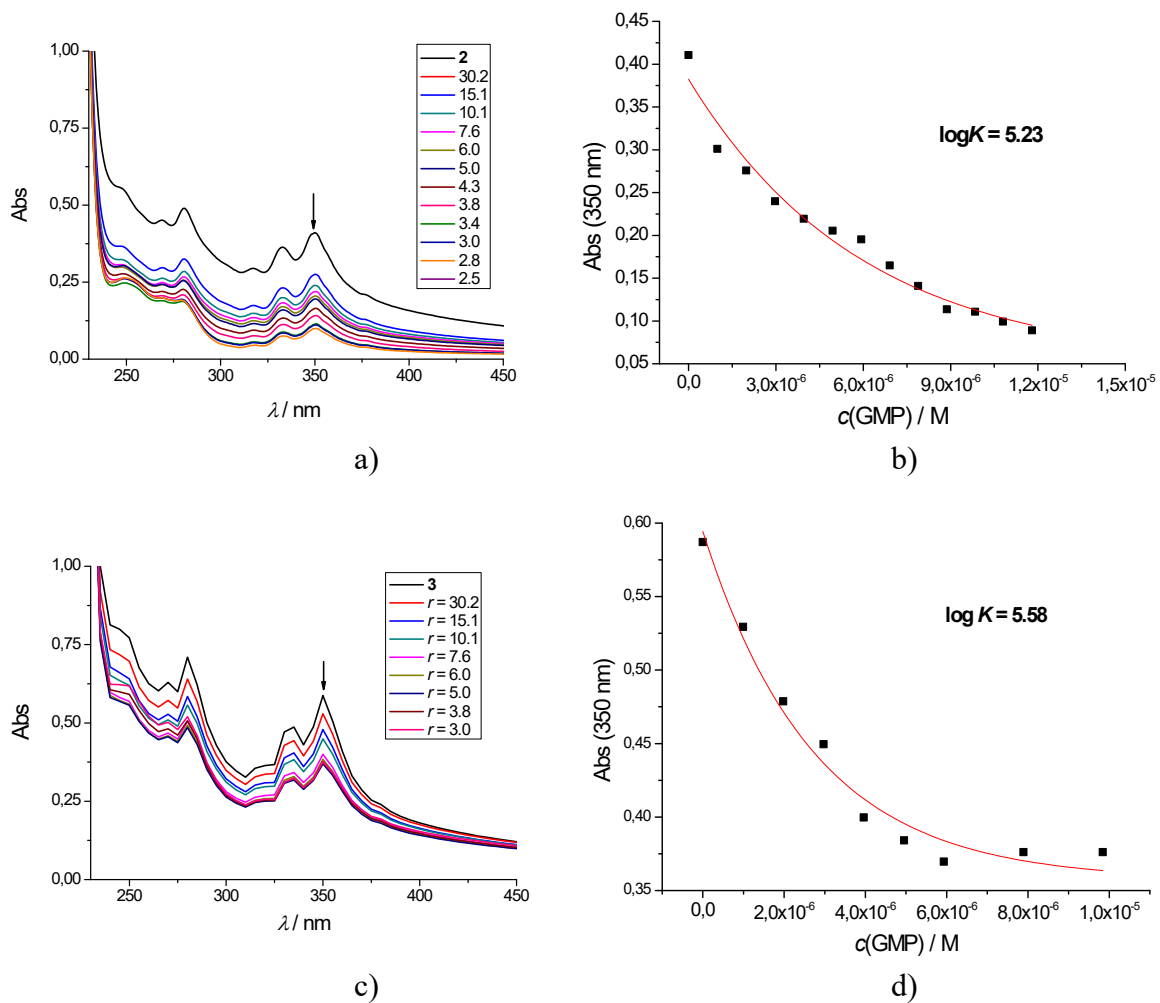

**Figure S18.** a) Spectrophotometric titration of **2** ( $c = 3 \times 10^{-5}$  M) with GMP ( $c = 1 \times 10^{-3}$  M) and b) dependence of absorption at  $\lambda_{\text{max}} = 350$  nm on  $c(\text{GMP})$ ; c) spectrophotometric titration of **3** ( $c = 3 \times 10^{-5}$  M) with GMP ( $c = 1 \times 10^{-3}$  M) and d) dependence of absorption at  $\lambda_{\text{max}} = 350$  nm on  $c(\text{GMP})$ . Done in sodium cacodylate buffer (pH=7.0,  $I = 0.05$  M);  $r = [\text{compound}] / [\text{mononucleotide}]$ .



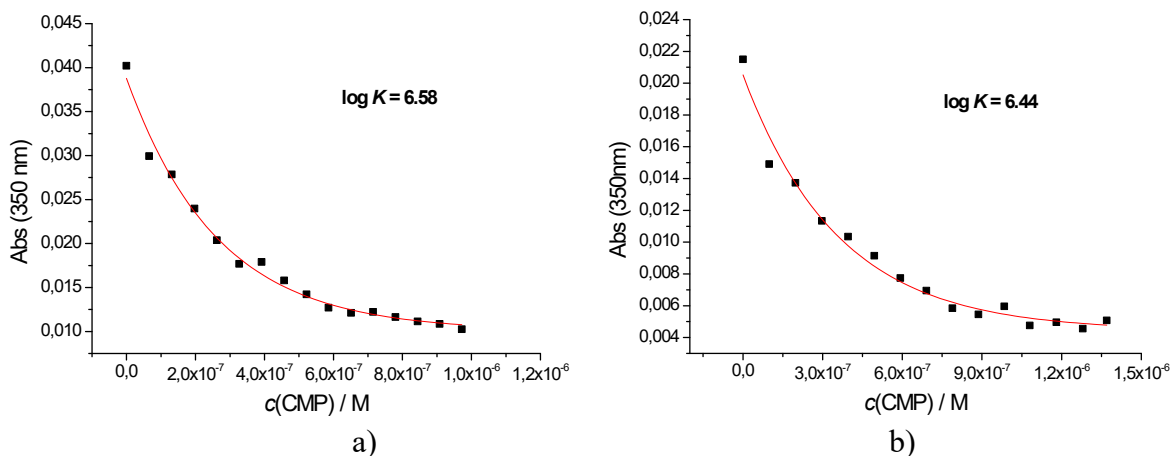

**Figure S19.** a) Absorption dependence of **2** ( $c = 2 \times 10^{-6} \text{ M}$ ) on concentration of CMP ( $c = 6.67 \times 10^{-5} \text{ M}$ ) at  $\lambda_{\text{max}} = 350 \text{ nm}$  on  $c(\text{CMP})$ ; b) Absorption dependence of **3** ( $c = 3 \times 10^{-6} \text{ M}$ ) on concentration of CMP ( $c = 1 \times 10^{-4} \text{ M}$ ) at  $\lambda_{\text{max}} = 350 \text{ nm}$  on  $c(\text{CMP})$ . Done in sodium cacodylate buffer (pH=7.0,  $I = 0.05 \text{ M}$ ).

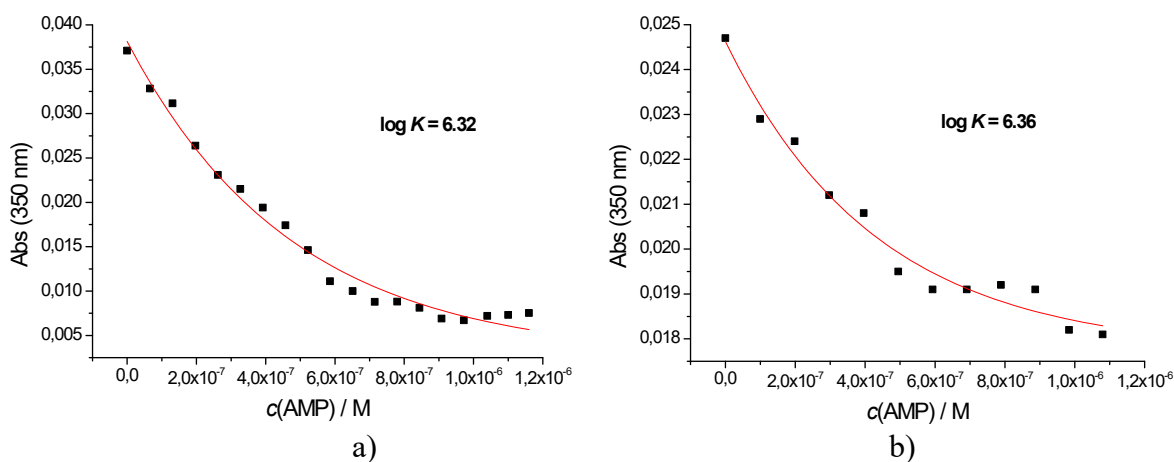

**Figure S20.** a) Absorption dependence of **2** ( $c = 2 \times 10^{-6} \text{ M}$ ) on concentration of AMP ( $c = 6.67 \times 10^{-5} \text{ M}$ ) at  $\lambda_{\text{max}} = 350 \text{ nm}$  on  $c(\text{AMP})$ ; b) Absorption dependence of **3** ( $c = 3 \times 10^{-6} \text{ M}$ ) on concentration of AMP ( $c = 1 \times 10^{-4} \text{ M}$ ) at  $\lambda_{\text{max}} = 350 \text{ nm}$  on  $c(\text{AMP})$ . Done in sodium cacodylate buffer (pH=7.0,  $I = 0.05 \text{ M}$ ).

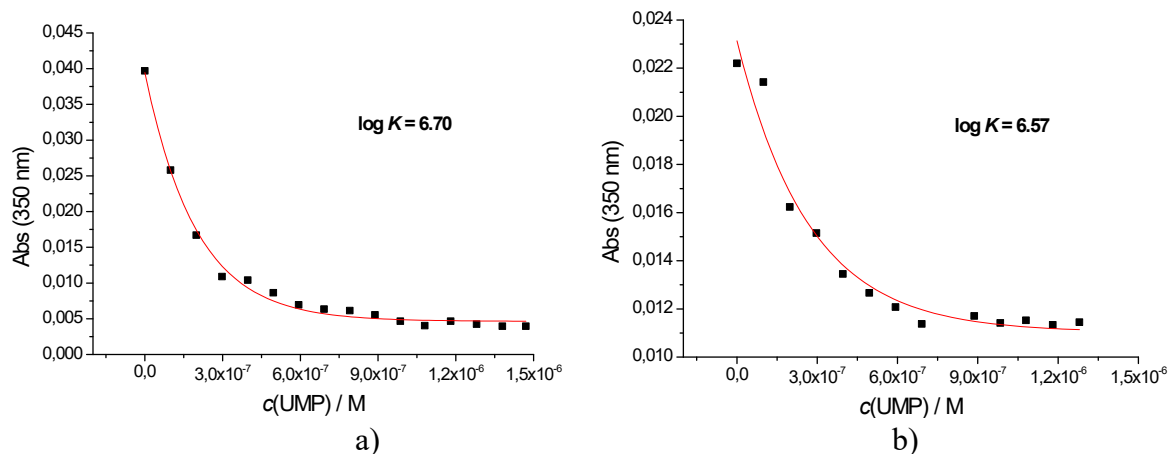

**Figure S21.** a) Absorption dependence of **2** ( $c = 2 \times 10^{-6}$  M) on concentration of UMP ( $c = 1 \times 10^{-4}$  M) at  $\lambda_{\max} = 350$  nm on  $c(\text{UMP})$ ; b) Absorption dependence of **3** ( $c = 3 \times 10^{-6}$  M) on concentration of UMP ( $c = 1 \times 10^{-4}$  M) at  $\lambda_{\max} = 350$  nm on  $c(\text{UMP})$ . Done in sodium cacodylate buffer (pH=7.0,  $I = 0.05$  M).

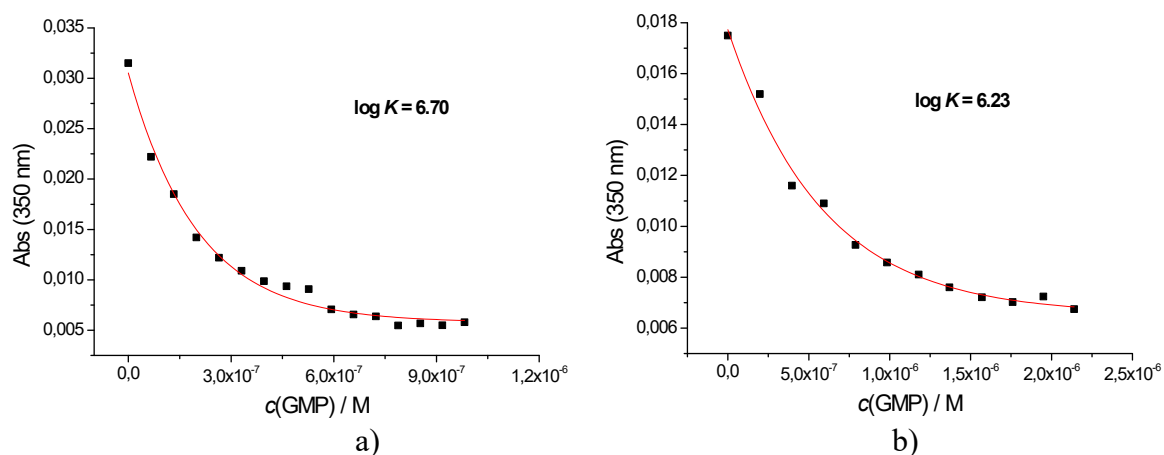

**Figure S22.** a) Absorption dependence of **2** ( $c = 2 \times 10^{-6}$  M) on concentration of GMP ( $c = 6.67 \times 10^{-5}$  M) at  $\lambda_{\max} = 350$  nm on  $c(\text{GMP})$ ; b) Absorption dependence of **3** ( $c = 3 \times 10^{-6}$  M) on concentration of GMP ( $c = 1 \times 10^{-4}$  M) at  $\lambda_{\max} = 350$  nm on  $c(\text{GMP})$ . Done in sodium cacodylate buffer (pH=7.0,  $I = 0.05$  M).

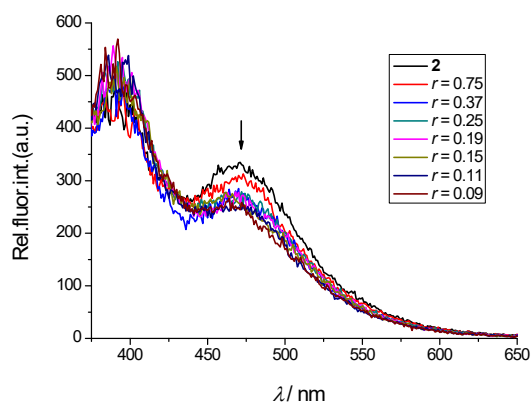

a)

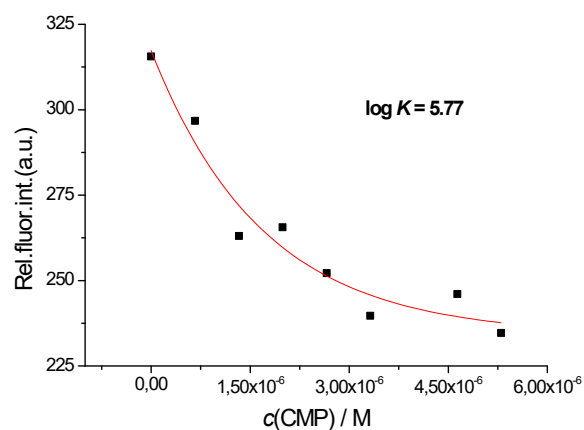

b)

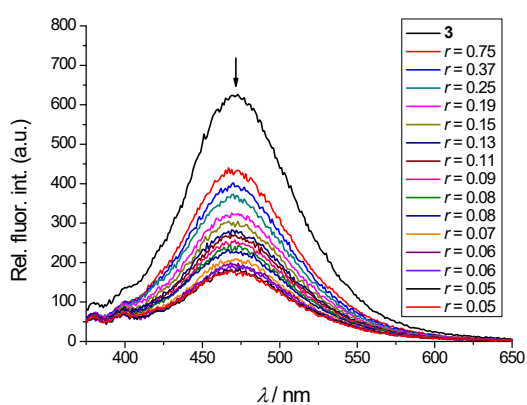

c)

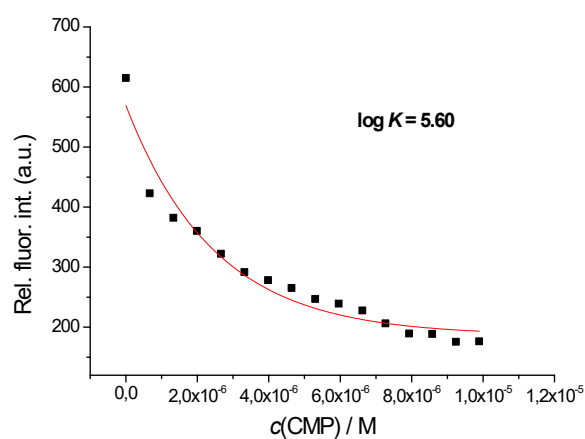

d)

**Figure S23.** a) Fluorimetric titration of **2** ( $c = 5 \times 10^{-7}$  M;  $\lambda_{\text{exc}} = 350$  nm) with CMP ( $c = 1 \times 10^{-3}$  M) and b) dependence of fluorescence at  $\lambda_{\text{max}} = 475$  nm on  $c(\text{CMP})$ ; c) fluorimetric titration of **3** ( $c = 5 \times 10^{-7}$  M;  $\lambda_{\text{exc}} = 350$  nm) with CMP ( $c = 1 \times 10^{-3}$  M) and d) dependence of fluorescence at  $\lambda_{\text{max}} = 475$  nm on  $c(\text{CMP})$ . Done in sodium cacodylate buffer (pH=7.0,  $I = 0.05$  M);  $r = [\text{compound}] / [\text{mononucleotide}]$ .

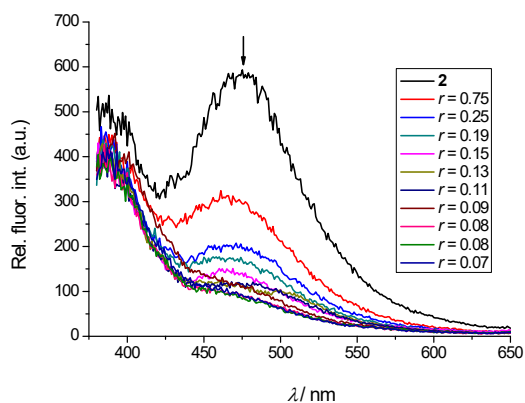

a)

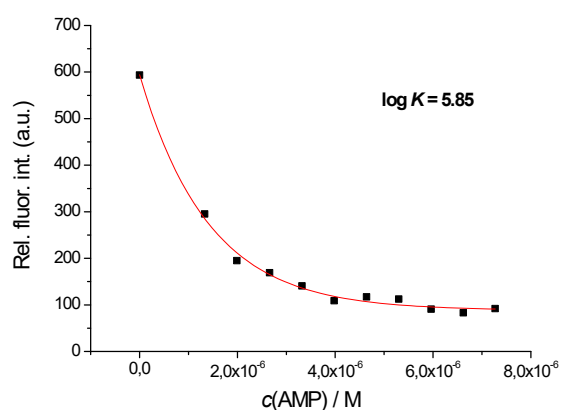

b)

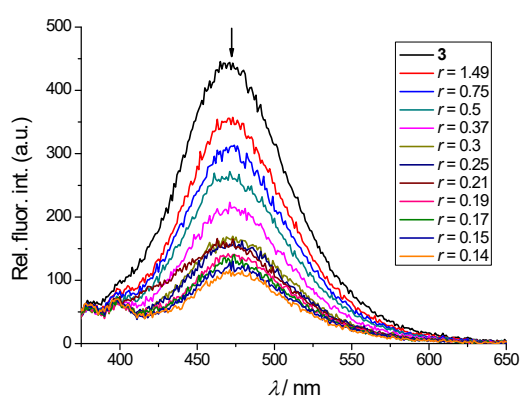

c)

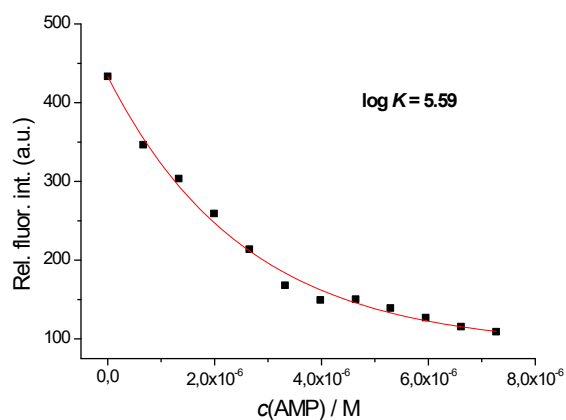

d)

**Figure S24.** a) Fluorimetric titration of **2** ( $c = 5 \times 10^{-7}$  M;  $\lambda_{\text{exc}} = 350$  nm) with AMP ( $c = 1 \times 10^{-3}$  M) and b) dependence of fluorescence at  $\lambda_{\text{max}} = 475$  nm on  $c(\text{AMP})$ ; c) fluorimetric titration of **3** ( $c = 1 \times 10^{-6}$  M;  $\lambda_{\text{exc}} = 350$  nm) with AMP ( $c = 1 \times 10^{-3}$  M) and d) dependence of fluorescence at  $\lambda_{\text{max}} = 475$  nm on  $c(\text{AMP})$ . Done in sodium cacodylate buffer (pH=7.0,  $I = 0.05$  M);  $r = [\text{compound}] / [\text{mononucleotide}]$ .

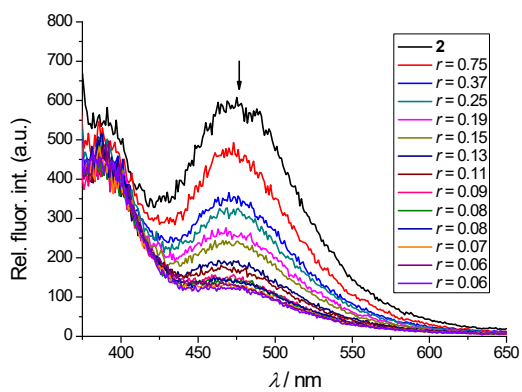

a)

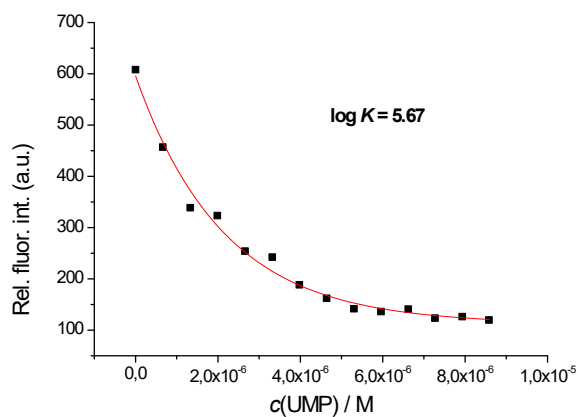

b)

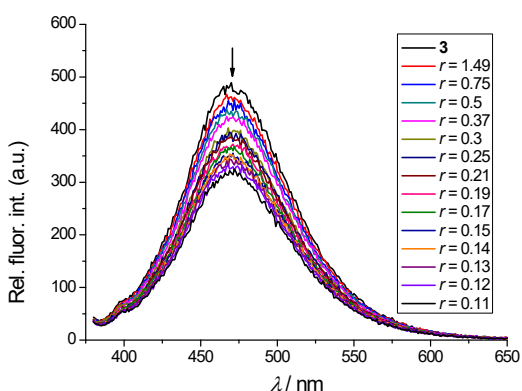

c)

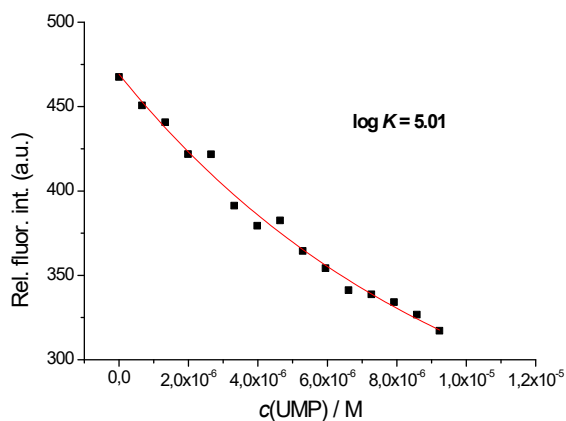

d)

**Figure S25.** a) Fluorimetric titration of **2** ( $c = 5 \times 10^{-7}$  M;  $\lambda_{\text{exc}} = 350$  nm) with UMP ( $c = 1 \times 10^{-3}$  M) and b) dependence of fluorescence at  $\lambda_{\text{max}} = 475$  nm on  $c(\text{UMP})$ ; c) fluorimetric titration of **3** ( $c = 1 \times 10^{-6}$  M;  $\lambda_{\text{exc}} = 350$  nm) with UMP ( $c = 1 \times 10^{-3}$  M) and d) dependence of fluorescence at  $\lambda_{\text{max}} = 475$  nm on  $c(\text{UMP})$ . Done in sodium cacodylate buffer (pH=7.0,  $I = 0.05$  M);  $r = [\text{compound}] / [\text{mononucleotide}]$ .

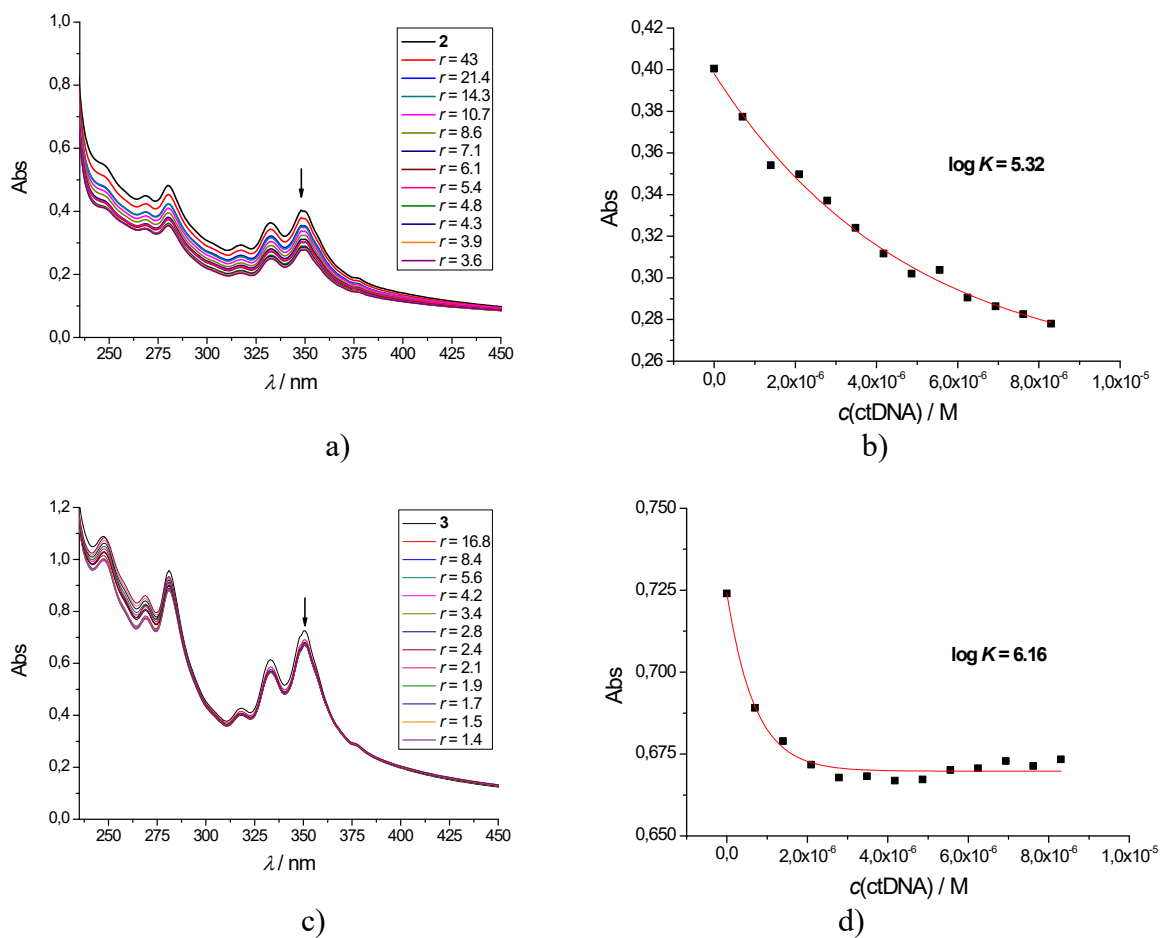

**Figure S26.** a) Spectrophotometric titration of **2** ( $c = 3 \times 10^{-5} \text{ M}$ ) with ctDNA ( $c = 7 \times 10^{-4} \text{ M}$ ) and b) dependence of absorption at  $\lambda_{\text{max}} = 350 \text{ nm}$  on  $c(\text{ctDNA})$ ; c) spectrophotometric titration of **3** ( $c = 3 \times 10^{-5} \text{ M}$ ) with ctDNA ( $c = 1.79 \times 10^{-3} \text{ M}$ ) and d) dependence of absorption at  $\lambda_{\text{max}} = 350 \text{ nm}$  on  $c(\text{ctDNA})$ . Done in sodium cacodylate buffer (pH=7.0,  $I = 0.05 \text{ M}$ );  $r = [\text{compound}] / [\text{DNA/RNA}]$ .

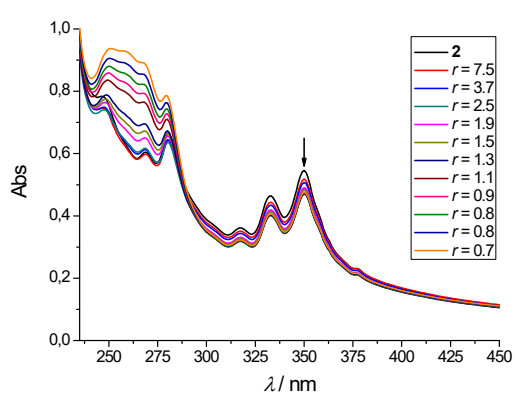

a)

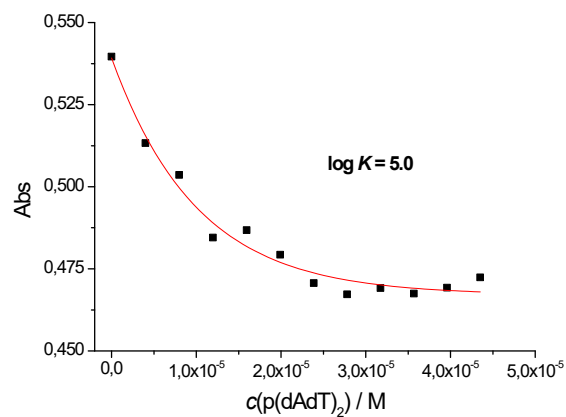

b)

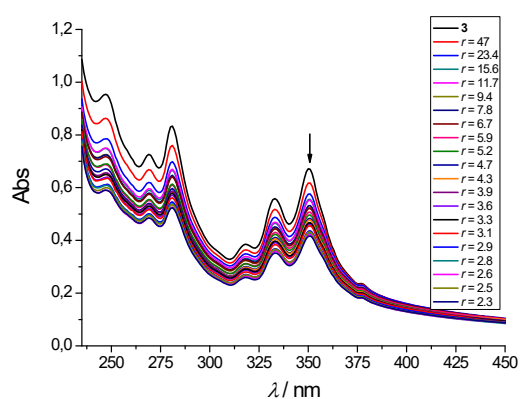

c)

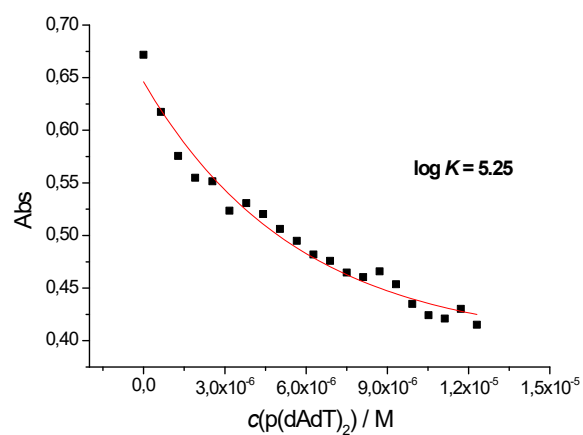

d)

**Figure S27.** a) Spectrophotometric titration of **2** ( $c = 3 \times 10^{-5}$  M) with  $p(dAdT)_2$  ( $c = 4 \times 10^{-3}$  M) and b) dependence of absorbance at  $\lambda_{\max} = 350$  nm on  $c(p(dAdT)_2)$ ; c) spectrophotometric titration of **3** ( $c = 3 \times 10^{-5}$  M) with  $p(dAdT)_2$  ( $c = 3.2 \times 10^{-4}$  M) and d) dependence of absorbance at  $\lambda_{\max} = 350$  nm on  $c(p(dAdT)_2)$ . Done in sodium cacodylate buffer (pH=7.0,  $I = 0.05$  M);  $r = [\text{compound}] / [\text{DNA/RNA}]$ .

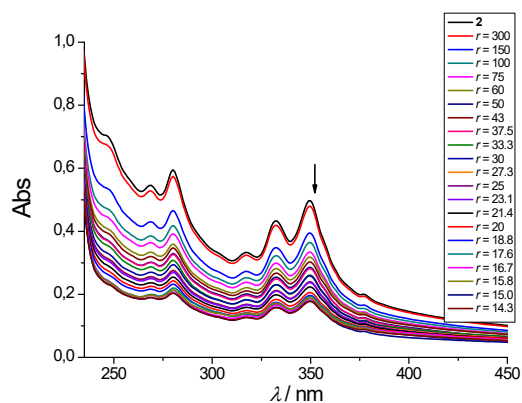

a)

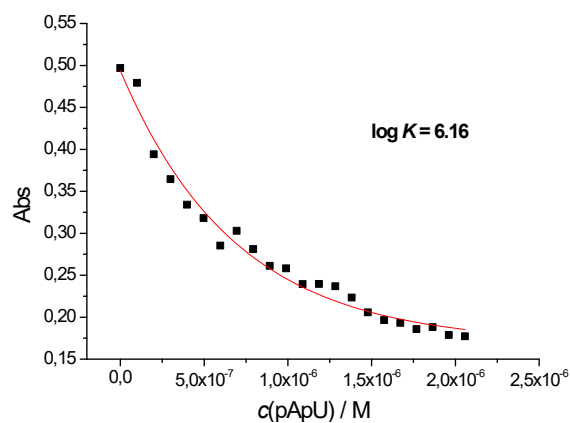

b)

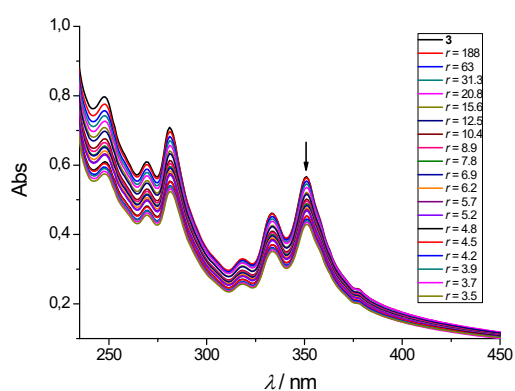

c)

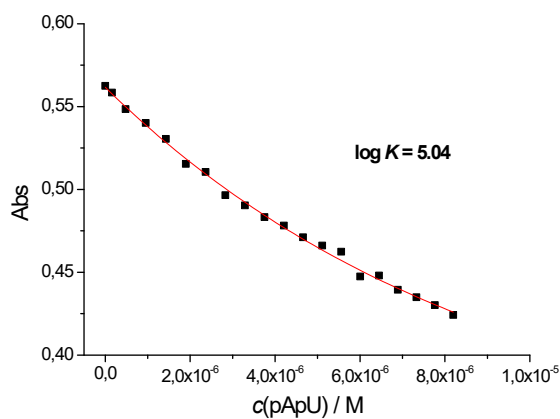

d)

**Figure S28.** a) Spectrophotometric titration of **2** ( $c = 3 \times 10^{-5}$  M) with pApU ( $c = 1 \times 10^{-4}$  M) and b) dependence of absorbance at  $\lambda_{\max} = 350$  nm on  $c(\text{pApU})$ ; c) spectrophotometric titration of **3** ( $c = 3 \times 10^{-5}$  M) with pApU ( $c = 1.6 \times 10^{-4}$  M) and d) dependence of absorbance at  $\lambda_{\max} = 350$  nm on  $c(\text{pApU})$ . Done in sodium cacodylate buffer (pH=7.0,  $I = 0.05$  M);  $r = [\text{compound}] / [\text{DNA/RNA}]$ .



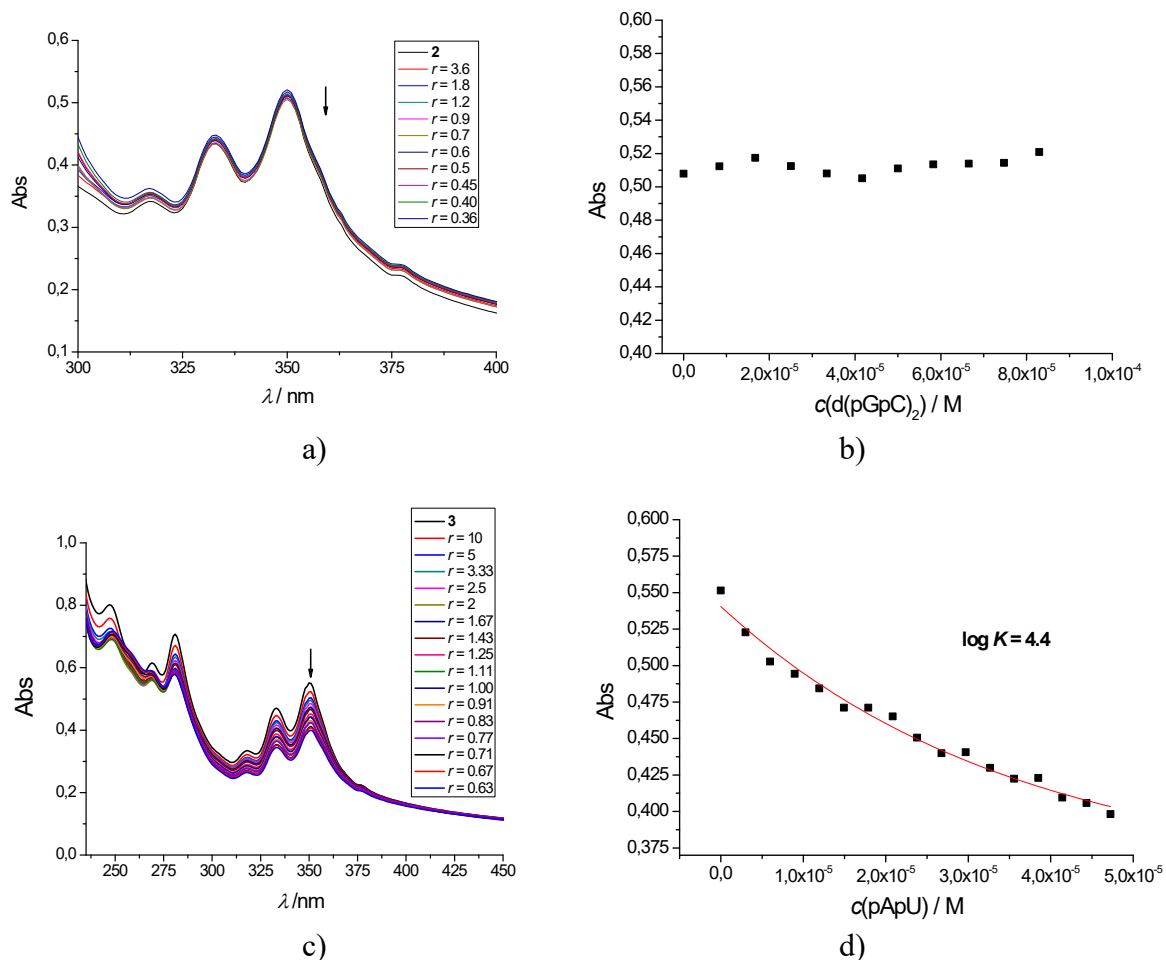

**Figure S29.** a) Spectrophotometric titration of **2** ( $c = 3 \times 10^{-5}$  M) with  $p(dGdC)_2$  ( $c = 8.38 \times 10^{-3}$  M) and b) dependence of absorption at  $\lambda_{max} = 350$  nm on  $c(p(dGdC)_2)$ ; c) spectrophotometric titration of **3** ( $c = 3 \times 10^{-5}$  M) with  $p(dGdC)_2$  ( $c = 3 \times 10^{-3}$  M) and d) dependence of absorption at  $\lambda_{max} = 350$  nm on  $c(p(dGdC)_2)$ . Done in sodium cacodylate buffer (pH=7.0,  $I = 0.05$  M);  $r = [\text{compound}] / [\text{DNA/RNA}]$ .

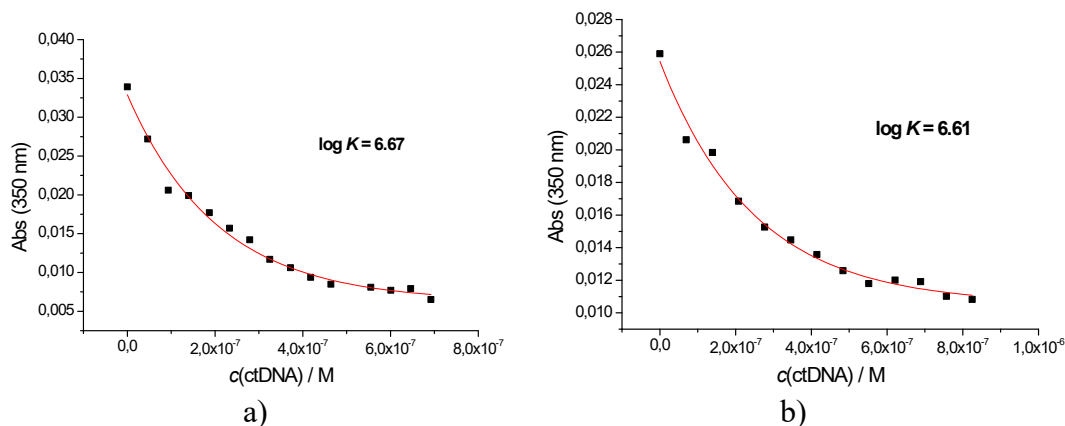

**Figure S30.** a) Absorption dependence of **2** ( $c = 2 \times 10^{-6}$  M) on concentration of ctDNA ( $c = 4.7 \times 10^{-5}$  M) at  $\lambda_{\max} = 350$  nm; b) Absorption dependence of **3** ( $c = 3 \times 10^{-6}$  M) on concentration of ctDNA ( $c = 7 \times 10^{-5}$  M) at  $\lambda_{\max} = 350$  nm on  $c(\text{ctDNA})$ . Done in sodium cacodylate buffer (pH=7.0,  $I = 0.05$  M);  $r = [\text{compound}] / [\text{DNA/RNA}]$ .

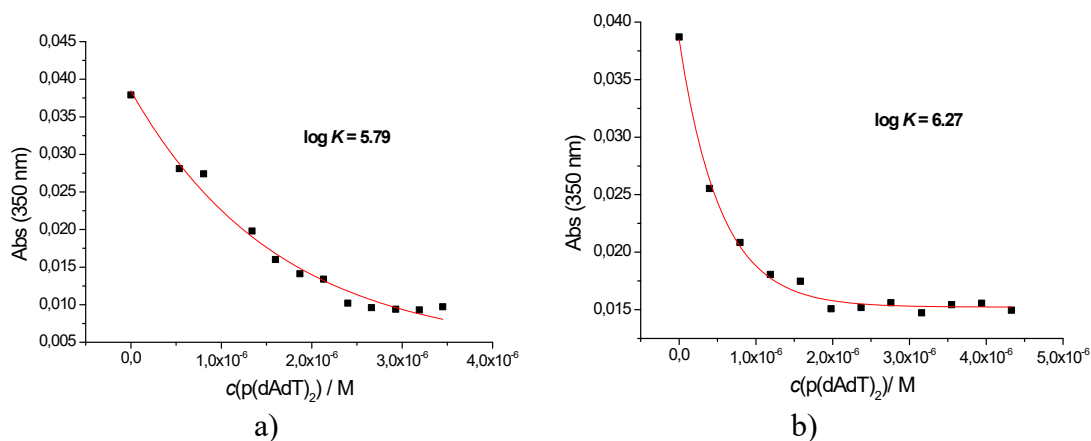

**Figure S31.** a) Absorption dependence of **2** ( $c = 2 \times 10^{-6}$  M) on concentration of p(dAdT)<sub>2</sub> ( $c = 2.7 \times 10^{-4}$  M) at  $\lambda_{\max} = 350$  nm on  $c(\text{p(dAdT)}_2)$ ; b) Absorption dependence of **3** ( $c = 3 \times 10^{-6}$  M) on concentration of p(dAdT)<sub>2</sub> ( $c = 4 \times 10^{-4}$  M) at  $\lambda_{\max} = 350$  nm on  $c(\text{p(dAdT)}_2)$ . Done in sodium cacodylate buffer (pH=7.0,  $I = 0.05$  M);  $r = [\text{compound}] / [\text{DNA/RNA}]$ .

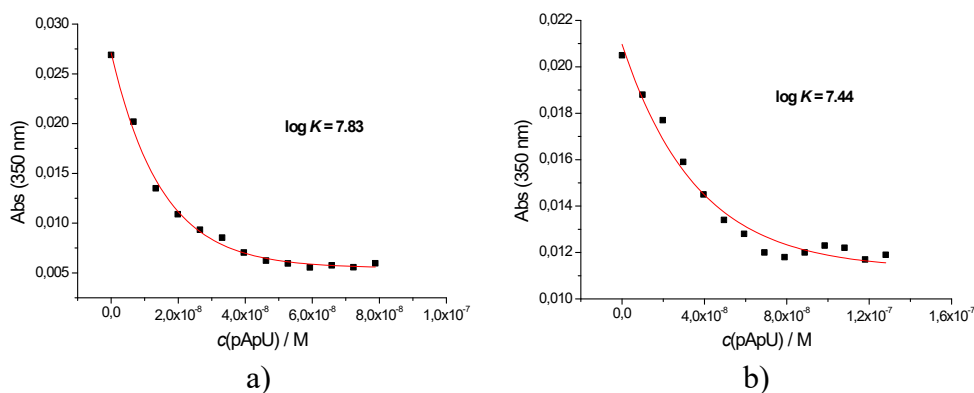

**Figure S32.** a) Absorption dependence of **2** ( $c = 2 \times 10^{-6}$  M) on concentration of pApU ( $c = 6.67 \times 10^{-6}$  M) at  $\lambda_{\max} = 350$  nm on  $c(\text{pApU})$ ; b) Absorption dependence of **3** ( $c = 3 \times 10^{-6}$  M) on concentration of pApU ( $c = 1 \times 10^{-5}$  M) at  $\lambda_{\max} = 350$  nm on  $c(\text{pApU})$ . Done in sodium cacodylate buffer (pH=7.0,  $I = 0.05$  M);  $r = [\text{compound}] / [\text{DNA/RNA}]$ .

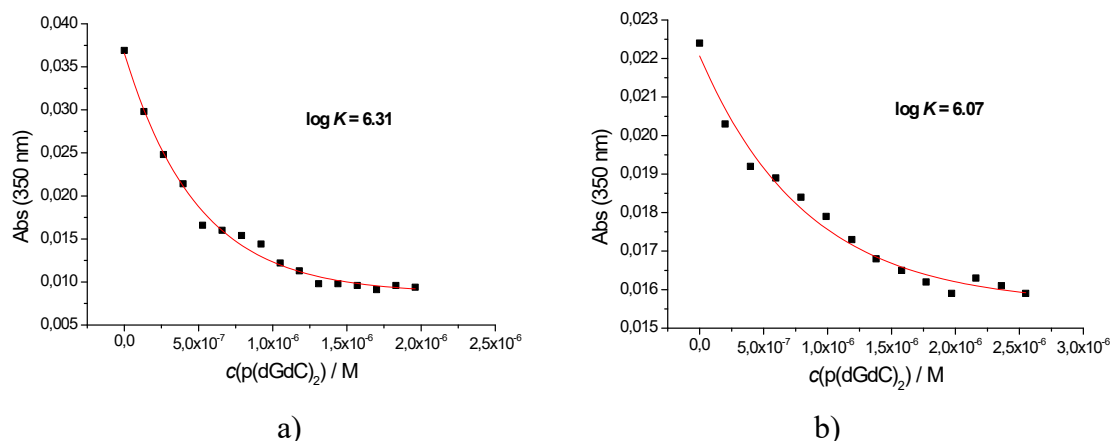

**Figure S33.** a) Absorption dependence of **2** ( $c = 2 \times 10^{-6}$  M) on concentration of p(dGdC)<sub>2</sub> ( $c = 1.33 \times 10^{-4}$  M) at  $\lambda_{\max} = 350$  nm on  $c(\text{p(dGdC)}_2)$ ; b) Absorption dependence of **3** ( $c = 3 \times 10^{-6}$  M) on concentration of p(dGdC)<sub>2</sub> ( $c = 2 \times 10^{-4}$  M) at  $\lambda_{\max} = 350$  nm on  $c(\text{p(dGdC)}_2)$ . Done in sodium cacodylate buffer (pH=7.0,  $I = 0.05$  M);  $r = [\text{compound}] / [\text{DNA/RNA}]$ .

**Table S2.** Binding constants (<sup>a</sup>log $K$ ) for **2** and **3** with mononucleotides and ds-DNA/ds-RNA determined spectrophotometrically. Done in sodium cacodylate buffer (pH = 7.0,  $I = 0.05$  M).

|                      | <b>2</b>         | <b>3</b>         |
|----------------------|------------------|------------------|
| CMP                  | 5.4              | 5.4              |
| AMP                  | 5.0              | 5.2              |
| UMP                  | 5.1              | 5.0              |
| GMP                  | 5.2              | 5.6              |
| ctDNA                | 6.7 <sup>b</sup> | 6.6 <sup>b</sup> |
| p(dAdT) <sub>2</sub> | 5.8 <sup>b</sup> | 6.3 <sup>b</sup> |
| pApU                 | 7.8 <sup>b</sup> | 7.4 <sup>b</sup> |
| p(dGdC) <sub>2</sub> | 6.3 <sup>b</sup> | 6.1 <sup>b</sup> |

<sup>a</sup> The best fit of experimental data was obtained for 1:1 stoichiometry of dye/NMP complex or for DNA/RNA by processing of titration data by means of Scatchard equation gave values of ratio  $n[\text{bound dye}] / [\text{DNA/RNA}] = 0.1$  and  $0.2$ , for easier comparison all log $K$  values were re-calculated for fixed  $n = 0.2$ .

<sup>b</sup> UV-Vis titration performed at 350 nm.

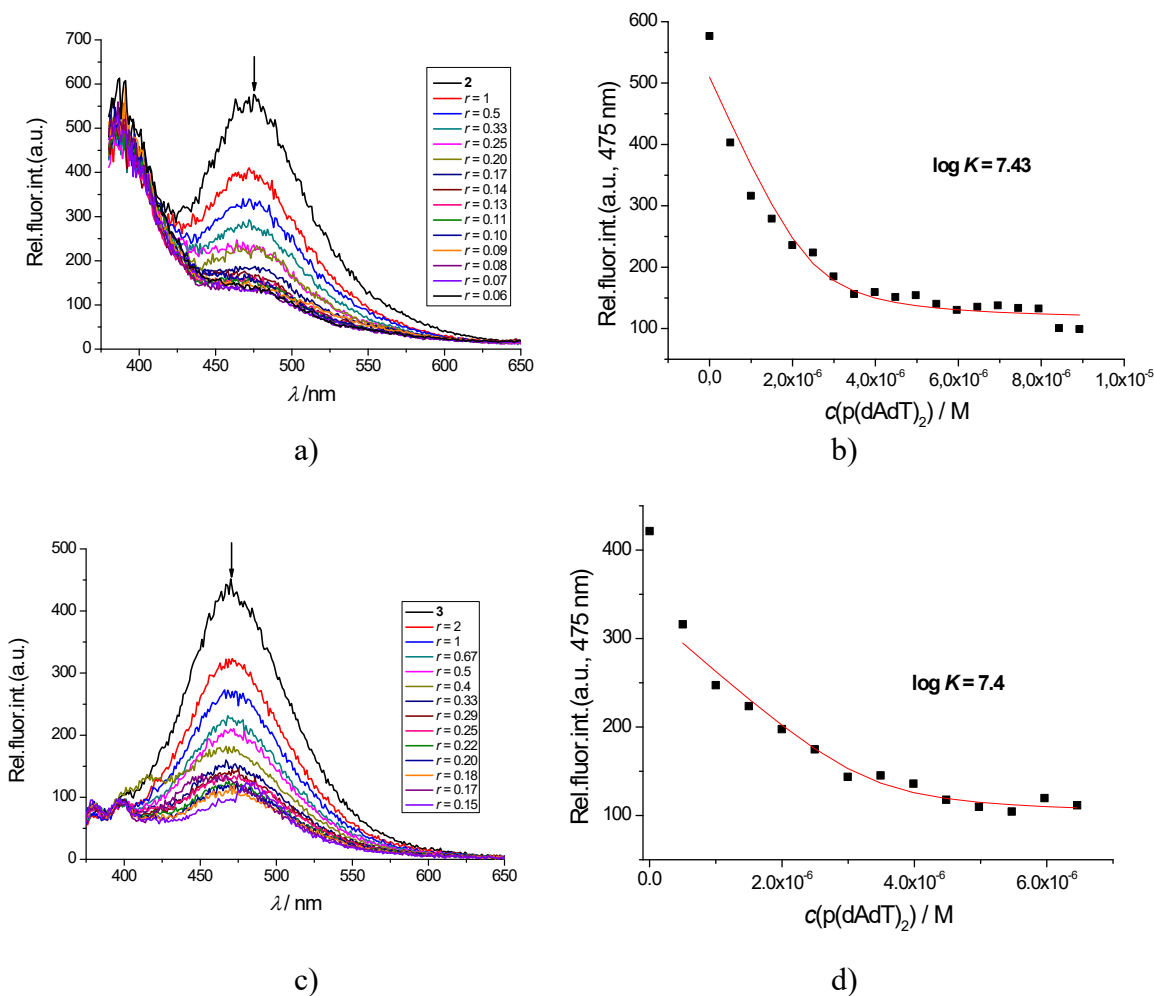

**Figure S34.** a) Fluorimetric titration of **2** ( $c = 5 \times 10^{-7}$  M;  $\lambda_{\text{exc}} = 350$  nm) with  $p(\text{dAdT})_2$  ( $c = 1 \times 10^{-3}$  M) and b) dependence of fluorescence at  $\lambda_{\text{max}} = 475$  nm on  $c(p(\text{dAdT})_2)$ ; c) fluorimetric titration of **3** ( $c = 1 \times 10^{-6}$  M;  $\lambda_{\text{exc}} = 350$  nm) with  $p(\text{dAdT})_2$  ( $c = 1 \times 10^{-3}$  M) and d) dependence of fluorescence at  $\lambda_{\text{max}} = 475$  nm on  $c(p(\text{dAdT})_2)$ . Done in sodium cacodylate buffer (pH=7.0,  $I = 0.05$  M);  $r = [\text{compound}] / [\text{DNA/RNA}]$ .

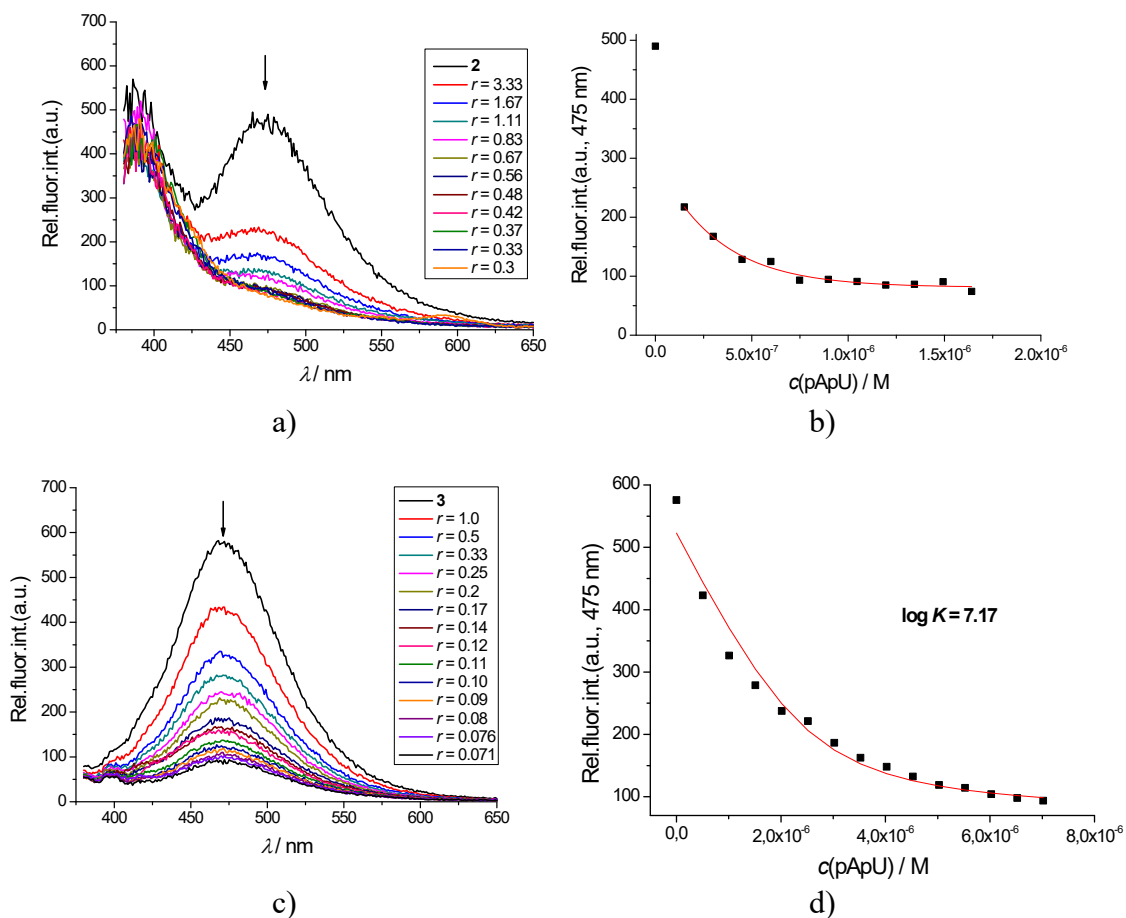

**Figure S35.** a) Fluorimetric titration of **2** ( $c = 5 \times 10^{-7} \text{ M}$ ;  $\lambda_{\text{exc}} = 350 \text{ nm}$ ) with pApU ( $c = 3 \times 10^{-4} \text{ M}$ ) and b) dependence of fluorescence at  $\lambda_{\text{max}} = 475 \text{ nm}$  on  $c(\text{pApU})$ ; c) fluorimetric titration of **3** ( $c = 5 \times 10^{-7} \text{ M}$ ;  $\lambda_{\text{exc}} = 350 \text{ nm}$ ) with pApU ( $c = 1.01 \times 10^{-3} \text{ M}$ ) and d) dependence of fluorescence at  $\lambda_{\text{max}} = 475 \text{ nm}$  on  $c(\text{pApU})$ . Done in sodium cacodylate buffer (pH=7.0,  $I = 0.05 \text{ M}$ );  $r = [\text{compound}] / [\text{DNA/RNA}]$ .

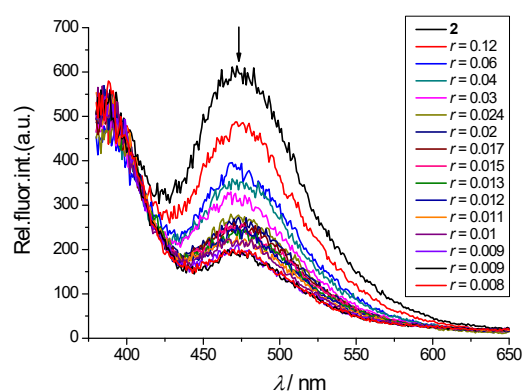

a)

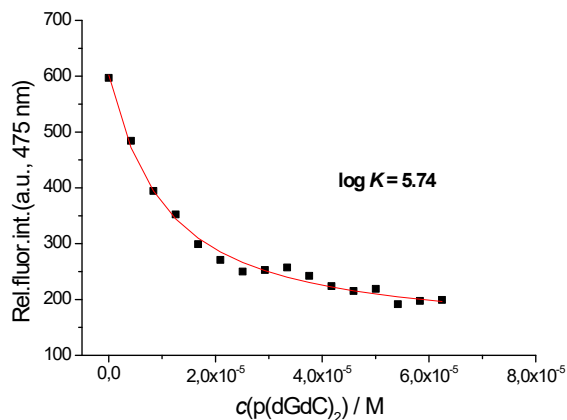

b)

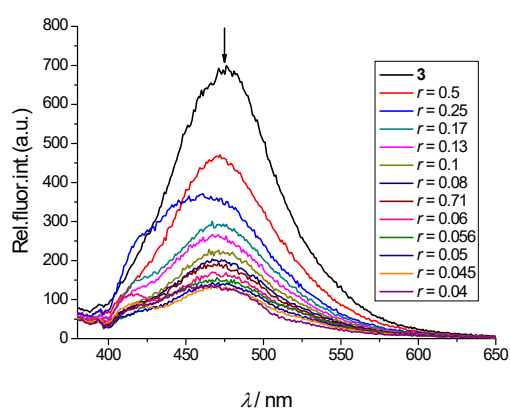

c)

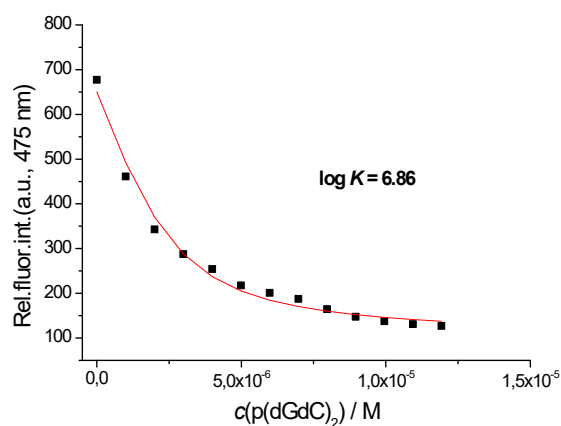

d)

**Figure S36.** a) Fluorimetric titration of **2** ( $c = 5 \times 10^{-7}$  M;  $\lambda_{\text{exc}} = 350$  nm) with  $\text{p(dGdC)}_2$  ( $c = 8.39 \times 10^{-3}$  M) and b) dependence of fluorescence at  $\lambda_{\text{max}} = 475$  nm on  $c(\text{p(dGdC)}_2)$ ; c) fluorimetric titration of **3** ( $c = 5 \times 10^{-7}$  M;  $\lambda_{\text{exc}} = 350$  nm) with  $\text{p(dGdC)}_2$  ( $c = 2 \times 10^{-3}$  M) and d) dependence of fluorescence at  $\lambda_{\text{max}} = 475$  nm on  $c(\text{p(dGdC)}_2)$ . Done in sodium cacodylate buffer (pH=7.0,  $I = 0.05$  M);  $r = [\text{compound}] / [\text{DNA/RNA}]$ .

### 3.2. Circular dichroism (CD) experiments

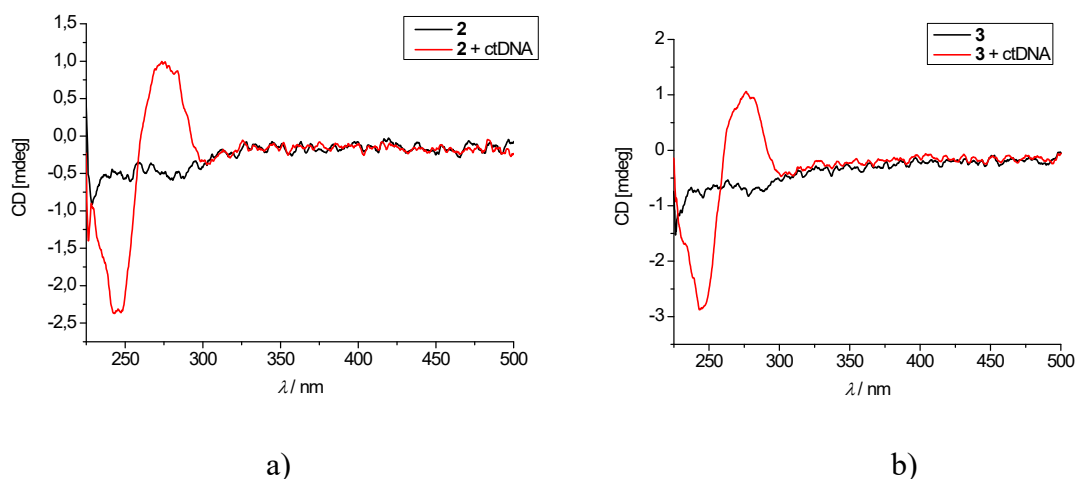

**Figure S37.** CD spectra of: a) **2** and b) **3** ( $c = 1 \times 10^{-5}$  M) and after addition of ctDNA ( $c = 3 \times 10^{-5}$  M) at molar ratio  $r = 3$  ( $r = [\text{compound}] / [\text{polynucleotide}]$ ). Done at pH = 7.0, sodium cacodylate buffer,  $I = 0.05$  M.

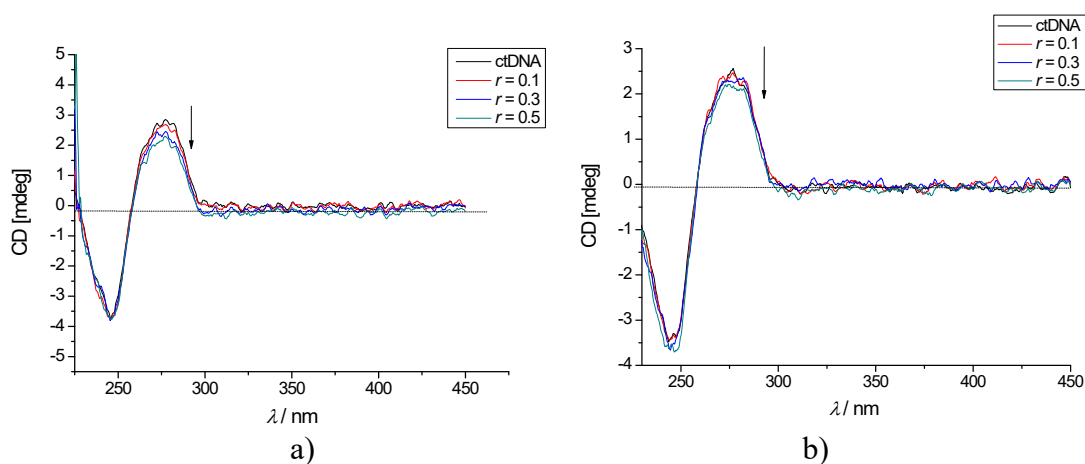

**Figure S38.** CD titration of ctDNA ( $c = 3 \times 10^{-5}$  M) with: a) **2** ( $c = 5 \times 10^{-3}$  M) and b) **3** ( $c = 5 \times 10^{-3}$  M) at different ratio. Done in sodium cacodylate buffer (pH = 7.0,  $I = 0.05$  M);  $r = [\text{compound}] / [\text{DNA/RNA}]$ .

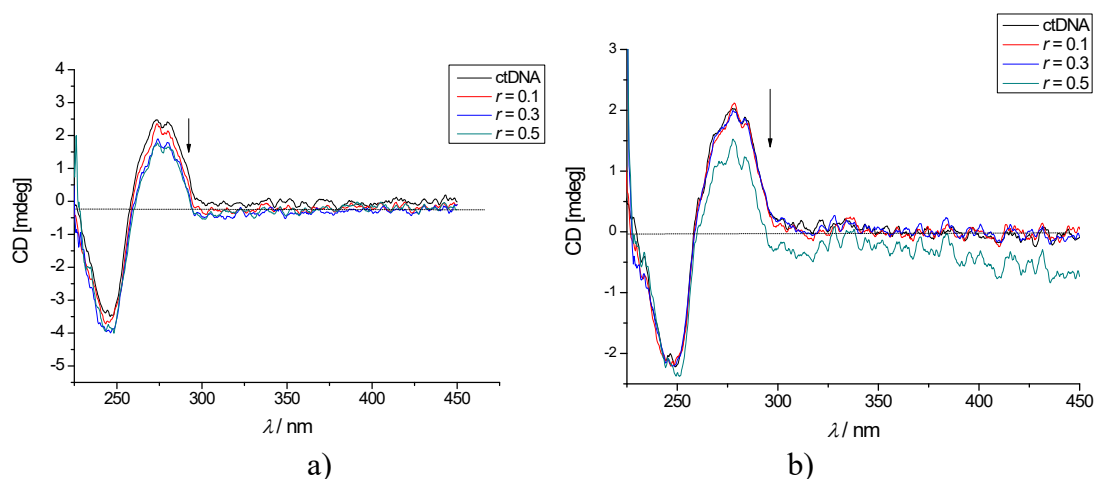

**Figure S39.** CD titration of ctDNA ( $c = 3 \times 10^{-5}$  M) with: a) **2**/ $\text{Cu}^{2+}$  ( $c = 1 \times 10^{-3}$  M) and b) **3**/ $\text{Cu}^{2+}$  ( $c = 1 \times 10^{-3}$  M) at different ratio. Done in sodium cacodylate buffer ( $\text{pH} = 7.0$ ,  $I = 0.05$  M);  $r = [\text{compound}] / [\text{DNA/RNA}]$ .

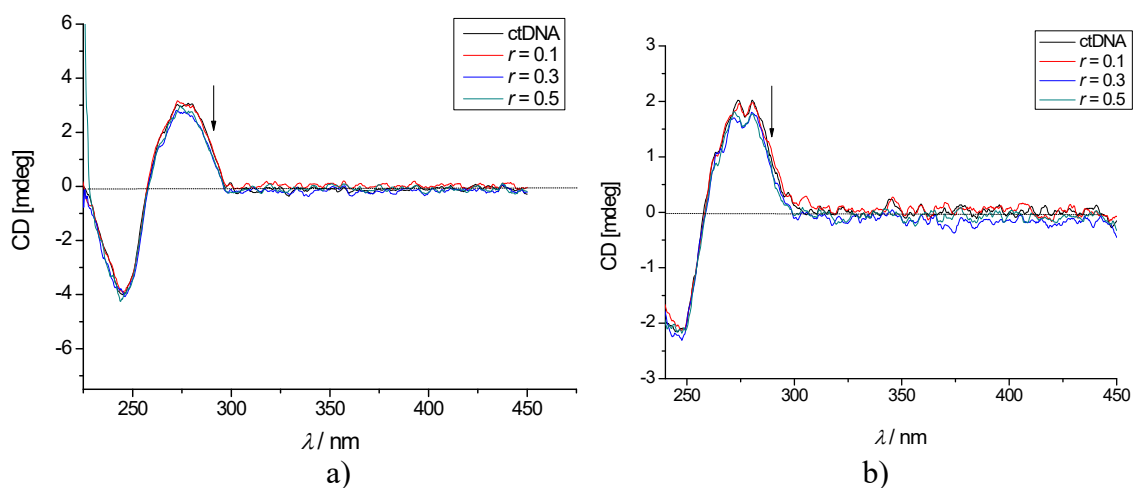

**Figure S40.** CD titration of ctDNA ( $c = 3 \times 10^{-5}$  M) with: a) **2**/ $\text{Zn}^{2+}$  ( $c = 1 \times 10^{-3}$  M) and b) **3**/ $\text{Zn}^{2+}$  ( $c = 1 \times 10^{-3}$  M) at different ratio. Done in sodium cacodylate buffer ( $\text{pH} = 7.0$ ,  $I = 0.05$  M);  $r = [\text{compound}] / [\text{DNA/RNA}]$ .



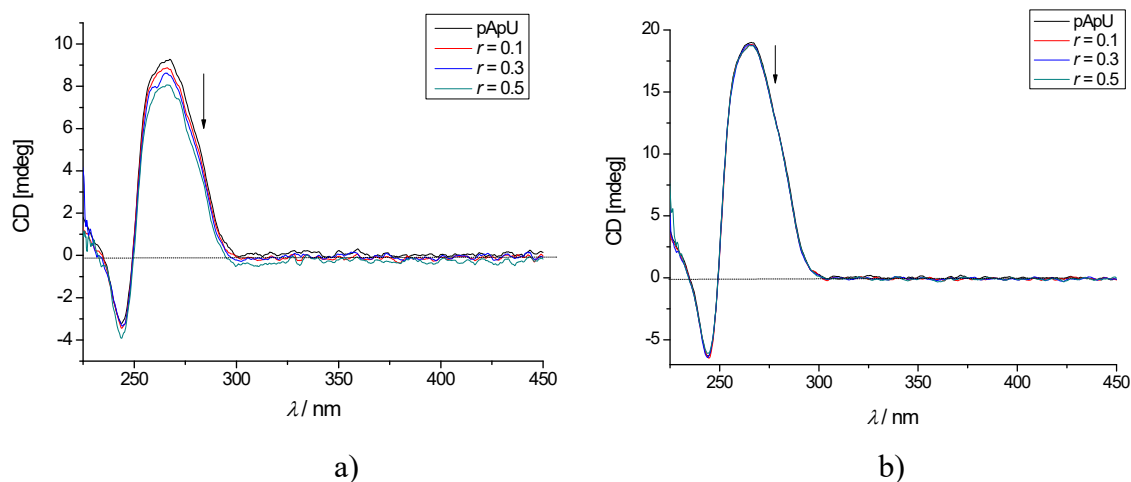

**Figure S41.** CD titration of pApU ( $c = 3 \times 10^{-5}$  M) with: a) **2** ( $c = 5 \times 10^{-3}$  M) and b) **3** ( $c = 5 \times 10^{-3}$  M) at different ratio. Done in sodium cacodylate buffer (pH = 7.0,  $I = 0.05$  M);  $r = [\text{compound}] / [\text{DNA/RNA}]$ .

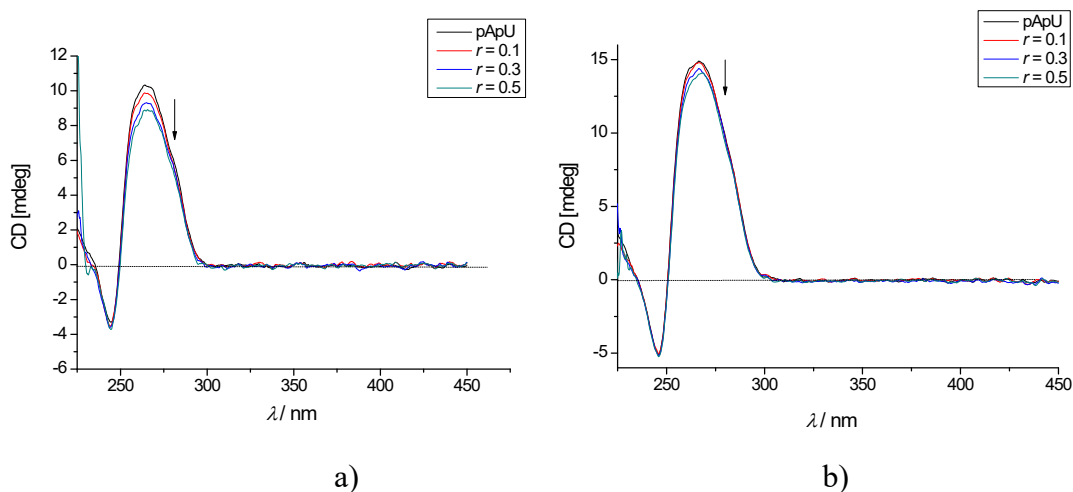

**Figure S42.** CD titration of pApU ( $c = 3 \times 10^{-5}$  M) with: a) **2**/ $\text{Cu}^{2+}$  ( $c = 5 \times 10^{-3}$  M) and b) **3**/ $\text{Cu}^{2+}$  ( $c = 5 \times 10^{-3}$  M) at different ratio. Done in sodium cacodylate buffer (pH = 7.0,  $I = 0.05$  M);  $r = [\text{compound}] / [\text{DNA/RNA}]$ .

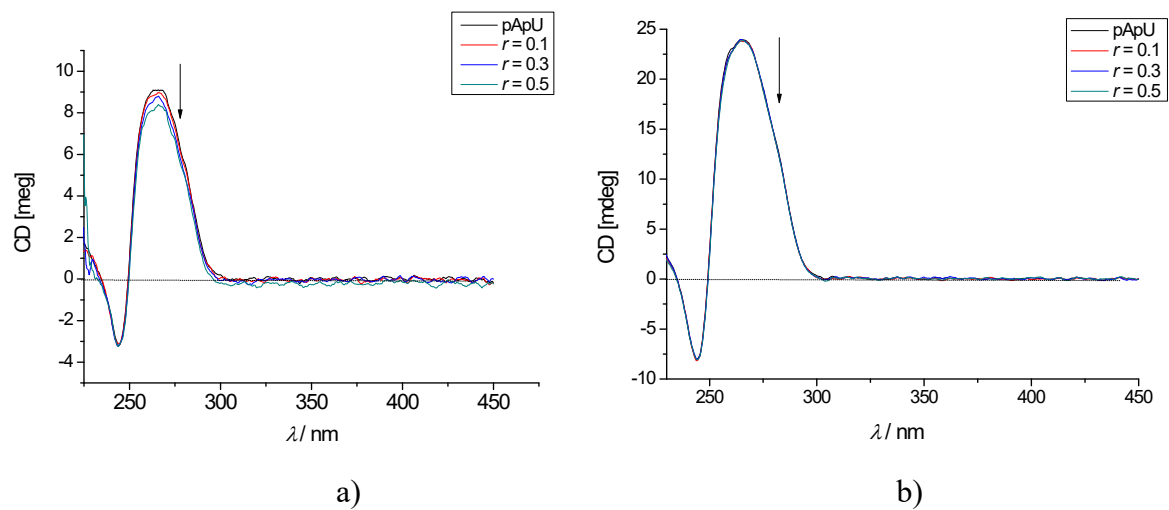

**Figure S43.** CD titration of pApU ( $c = 3 \times 10^{-5}$  M) with: a) **2**/ $\text{Zn}^{2+}$  ( $c = 5 \times 10^{-3}$  M) and b) **3**/ $\text{Zn}^{2+}$  ( $c = 5 \times 10^{-3}$  M) at different ratio. Done in sodium cacodylate buffer (pH = 7.0,  $I = 0.05$  M);  $r = [\text{compound}] / [\text{DNA/RNA}]$ .

### 3.3. Thermal denaturation experiments

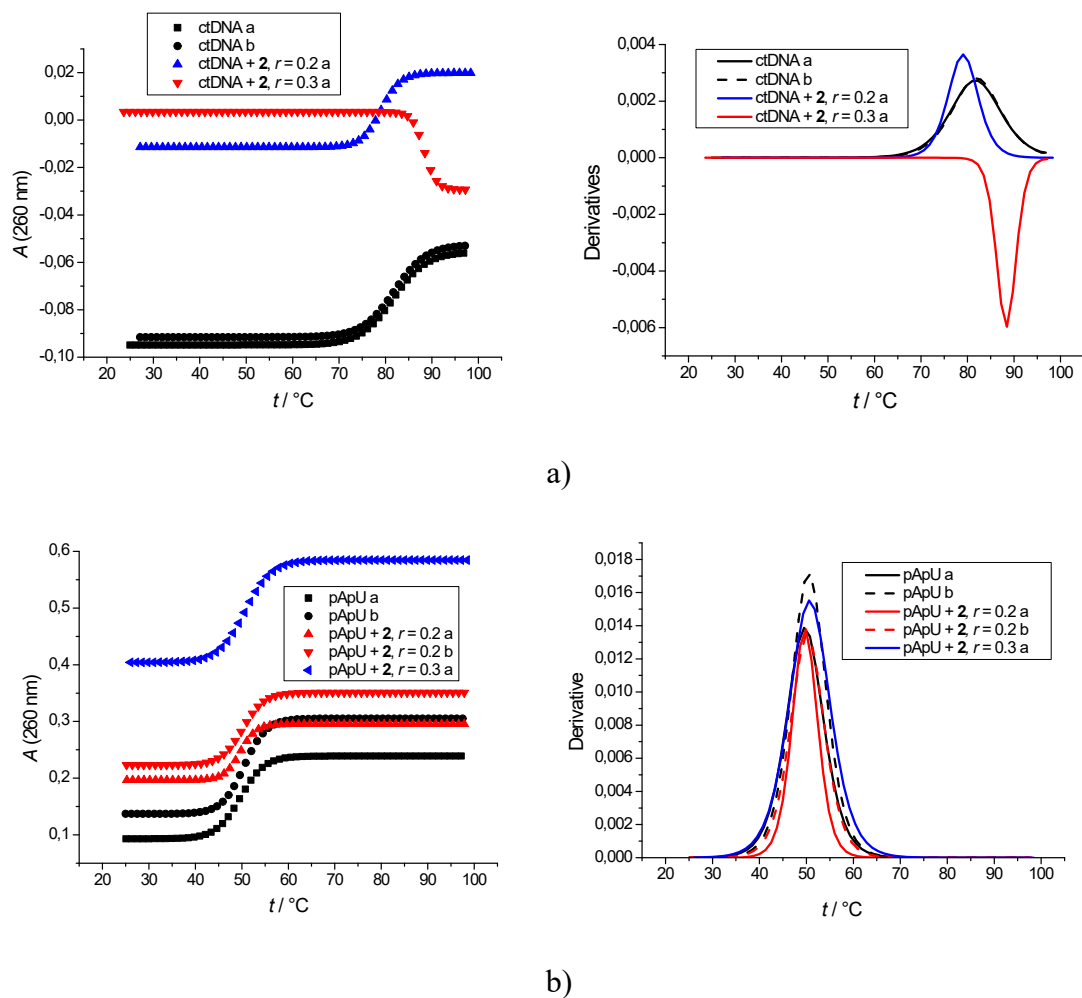

**Figure S44.** Thermal denaturation curves (left) and derivatives (right) of: a) ctDNA ( $c(\text{ctDNA}) = 2.27 \times 10^{-5}\text{ M}$ ) and b) pApU ( $c(\text{pApU}) = 2.27 \times 10^{-5}\text{ M}$ ) with 2 ( $c(2) = 5 \times 10^{-3}\text{ M}$ ). Done in sodium cacodylate buffer ( $\text{pH}=7.0$ ,  $I = 0.05\text{ M}$ );  $r = [\text{compound}] / [\text{DNA/RNA}]$ .

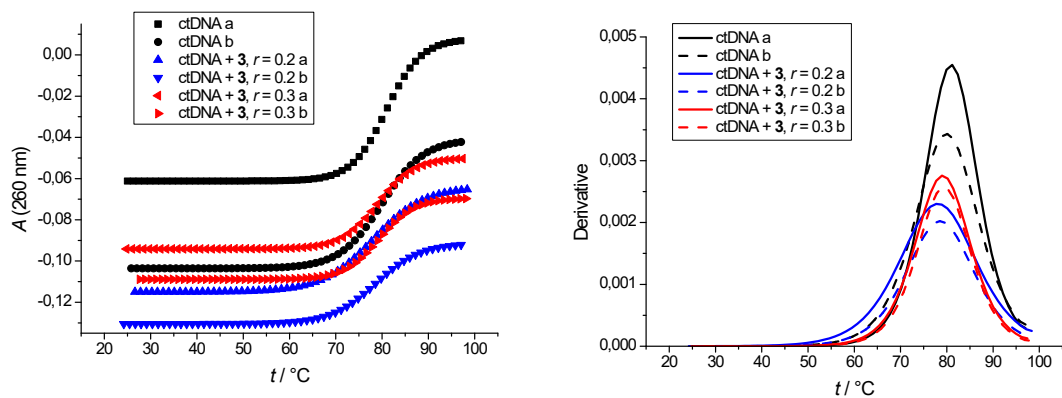

a)

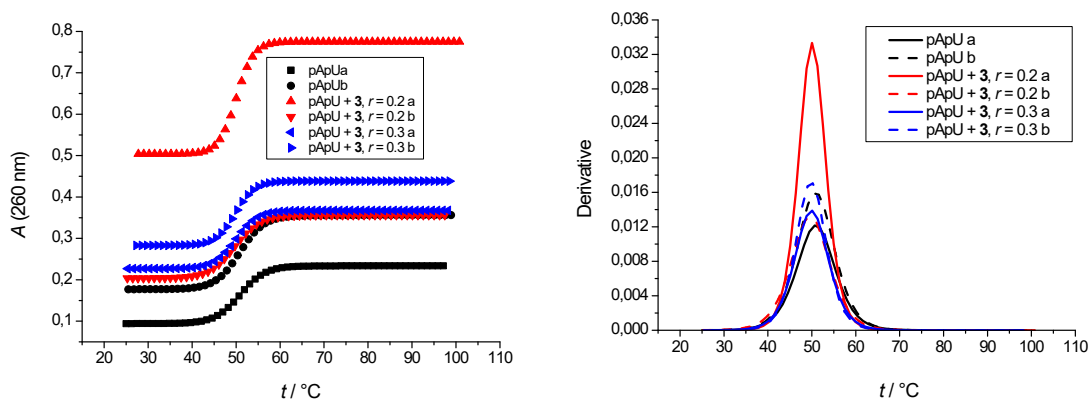

b)

**Figure S45.** Thermal denaturation curves (left) and derivatives (right) of: a) ctDNA ( $c(\text{ctDNA}) = 2.27 \times 10^{-5} \text{ M}$ ) and b) pApU ( $c(\text{pApU}) = 2.27 \times 10^{-5} \text{ M}$ ) with **3** ( $c(\mathbf{3}) = 5 \times 10^{-3} \text{ M}$ ). Done in sodium cacodylate buffer (pH=7.0,  $I = 0.05 \text{ M}$ );  $r = [\text{compound}] / [\text{DNA/RNA}]$ .

**Table S3.**  $\Delta T_m$  values for ctDNA and pApU with **2** and **3** at different ratios. Done in sodium cacodylate buffer (pH=7.0,  $I = 0.05 \text{ M}$ );  $r = [\text{compound}] / [\text{DNA/RNA}]$ .

|          |           | ctDNA | pApU |
|----------|-----------|-------|------|
| <b>2</b> | $r = 0.2$ | -2    | 0    |
|          | $r = 0.3$ | -     | +1   |
| <b>3</b> | $r = 0.2$ | -2    | -1   |
|          | $r = 0.3$ | -1    | -1   |

$$\Delta T_m = T_{m \text{ poly+compound}} - T_{m \text{ poly}}$$
